1 **Bioorthogonal non-canonical amino acid tagging reveals translationally active**  
2 **subpopulations of the cystic fibrosis lung microbiota.**

3  
4 Talia D. Valentini<sup>1#</sup>, Sarah K. Lucas<sup>1#</sup>, Kelsey A. Binder<sup>1#</sup>, Lydia C. Cameron<sup>1</sup>, Jason A. Motl<sup>2</sup>, Jordan M. Dunitz<sup>3</sup>,  
5 Ryan C. Hunter<sup>1\*</sup>

6  
7 <sup>1</sup>Department of Microbiology & Immunology, University of Minnesota, 689 23rd Avenue SE, Minneapolis, MN  
8 55455

9 <sup>2</sup>Academic Health Center, University Flow Cytometry Resource, University of Minnesota, 6th St SE,  
10 Minneapolis, MN 55455

11 <sup>3</sup>Division of Pulmonary, Allergy, Critical Care & Sleep Medicine, University of Minnesota, 420 Delaware St. SE,  
12 Minneapolis, MN 55455

13  
14 # Authors contributed equally to this work

15 \* To whom correspondence should be addressed:

16  
17 Ryan C. Hunter  
18 Department of Microbiology & Immunology  
19 University of Minnesota  
20 689 23rd Ave. SE  
21 Minneapolis, MN 55455  
22 Tel: (612) 625-1402  
23 Email: [rchunter@umn.edu](mailto:rchunter@umn.edu)

24 **Abstract**

25 Culture-independent studies of cystic fibrosis lung microbiota have provided few mechanistic insights  
26 into the polymicrobial basis of disease. Deciphering the specific contributions of individual taxa to CF  
27 pathogenesis requires a comprehensive understanding of their *in situ* ecophysiology. We applied  
28 bioorthogonal non-canonical amino acid tagging (BONCAT), a 'click' chemistry-based metabolic  
29 labeling approach, to quantify and visualize translational activity among CF microbiota. Using  
30 BONCAT-based fluorescent imaging on sputum collected from stable CF subjects, we reveal that only  
31 a subset of bacteria are translationally active. We also combined BONCAT with fluorescent activated  
32 cell sorting (FACS) and 16S rRNA gene sequencing to assign taxonomy to the active subpopulation  
33 and found that the most dominant taxa are indeed translationally active. On average, only ~12-18% of  
34 bacterial cells were BONCAT labeled, suggesting a heterogeneous growth strategy widely employed  
35 by most airway microbiota. Differentiating translationally active populations from those that are  
36 dormant adds to our evolving understanding of the polymicrobial basis of CF lung disease and may  
37 help guide patient-specific therapeutic strategies targeting active bacterial populations that are most  
38 likely to be susceptible.

39           The increased viscosity and impaired clearance of mucus secretions in cystic fibrosis (CF)  
40   airways creates a favorable environment for chronic microbial colonization, the primary cause of  
41   patient morbidity and mortality (1). *Pseudomonas aeruginosa* and *Staphylococcus aureus* have long  
42   been recognized as primary CF pathogens and are the targets of common therapeutic regimens (2),  
43   though recent culture-independent studies have revealed a more complex polymicrobial community  
44   harboring facultative and obligately anaerobic bacteria that are relatively understudied (3-5). While the  
45   specific contributions of individual community members to disease progression remain poorly  
46   understood and at times controversial (6), cross-sectional studies of both pediatric and adult cohorts  
47   have revealed compelling relationships between bacterial community composition and disease state,  
48   antibiotic use, patient age and other phenotypes (7-12). These data have challenged the field to  
49   reconsider therapeutic strategies in a polymicrobial community context (13,14).

50           Relatively fewer studies have identified within-patient perturbations in bacterial community  
51   structures that coincide with pulmonary exacerbations (PEx), characterized by increased respiratory  
52   symptoms and an acute decrease in lung function. In general, PEx symptoms are resolved in  
53   response to antibiotic therapy (validating a bacterial etiology), though sputum cultures generally  
54   demonstrate that airway pathogens are recovered at similar densities before, during and after disease  
55   flares (15-18). Culture-independent studies show similar trends; with few exceptions (9,19,20)  
56   longitudinal sequencing analyses of sputum from individual subjects frequently reveal unique, patient-  
57   specific bacterial communities whose diversity and composition remain stable during PEx onset and  
58   upon resolution of patient symptoms (15,21,22). This lack of association between lung microbiota and  
59   disease dynamics may reflect the inability of both culture-based and sequencing approaches to  
60   capture changes in bacterial activity, which likely have a critical impact on disease progression and  
61   patient response to therapy.

62           To date, there have been few studies of bacterial growth and metabolism within the CF  
63   airways (23-28). RNA-based profiling of stable CF subjects has shown consistencies between rRNA  
64   and rDNA signatures suggesting that many bacterial taxa identified by 16S rRNA gene sequencing  
65   are transcriptionally active, though these data have also corroborated that bacterial community

66 membership is not necessarily predictive of *in vivo* growth activity (23,24). Indeed, interactions  
67 between respiratory pathogens and the host and/or co-colonizing microbiota can influence growth  
68 rates, metabolism, virulence factor production and antimicrobial susceptibility without an  
69 accompanying change in bacterial abundance (29-34). Moreover, growth rates of respiratory  
70 pathogens can vary substantially between subjects and even within a single sputum sample (25,26),  
71 the heterogeneity of which is not captured using conventional molecular profiling. There remains a  
72 need for novel methods to characterize *in situ* bacterial activity and its role in disease progression.

73 Bioorthogonal non-canonical amino acid tagging (BONCAT) has been used to characterize the  
74 activity of uncultured microbes in soil and marine samples (35-38). BONCAT relies on the cellular  
75 uptake of a non-canonical amino acid (*e.g.* L-azidohomoalanine (AHA), a L-methionine analog)  
76 carrying a chemically-modifiable azide group. After uptake, AHA exploits the substrate promiscuity of  
77 methionyl-tRNA synthetase and is incorporated into newly synthesized proteins. Translationally active  
78 cells can then be identified through a bioorthogonal azide-alkyne 'click' reaction in which a  
79 fluorophore-tagged alkyne is covalently ligated to AHA, resulting in a fluorescently labeled population  
80 of cells that can be further studied using a variety of microscopy and analytical methods. BONCAT  
81 has been shown to correlate with other established methods of quantifying microbial activity (36) and  
82 represents a robust tool for characterization of bacterial communities in their native growth  
83 environment.

84 BONCAT has also recently been used to study bacterial pathogens *in vitro* (39-42), though it  
85 has seen limited use in the study of human host-associated bacterial communities (36). Samples  
86 derived from the CF airways provide a unique opportunity to do so, as the site of infection is amenable  
87 to longitudinal studies and the bacterial growth environment is relatively stable upon removal from the  
88 host (43). Exploiting these advantages, we used BONCAT together with fluorescence-activated cell  
89 sorting (FACS) and 16S rRNA gene sequencing to characterize the *in situ* translational activity of  
90 bacterial communities within sputum. We reveal that active bacteria represent only a subset of  
91 microbiota captured using conventional 16S rRNA gene sequencing and discuss these results in the  
92 context of airway disease progression and treatment of individual patients.

## 93 RESULTS

94 **BONCAT differentiates translationally active and inactive *P. aeruginosa* cells *in vitro*.** To  
95 optimize the BONCAT experimental approach, we first grew *P. aeruginosa*, a canonical CF pathogen,  
96 to mid-log phase followed by supplementation with 6mM L-azidohomoalanine (AHA) for 3h. Post-AHA  
97 treatment, azide-alkyne 'click chemistry' using Cy5 labeled dibenzocyclooctyne (Cy5-DBCO)  
98 permitted fluorescent detection of translationally-active cells (Fig. 1a). Quantification of average Cy5  
99 pixel intensity per cell revealed active protein synthesis in ~98% of the population. By contrast,  
100 supplementation of the growth medium with 6mM L-methionine (MET) or pre-treatment of *P.*  
101 *aeruginosa* with tobramycin, chloramphenicol and tetracycline (to arrest *de novo* protein synthesis)  
102 prior to AHA resulted in negligible fluorescence (Fig. 1b,c). These data were also confirmed by SDS-  
103 PAGE (Supplementary Fig. 2). Finally, when two AHA labeled cultures (one treated with antibiotics,  
104 one without) were combined in a 1:1 ratio prior to Cy5-DBCO labeling, two subpopulations with only  
105 minor overlap in fluorescence intensity were identified, representing a mix of active and inactive cells  
106 (Fig. 1d). Together, these data demonstrate the utility of BONCAT for characterizing *P. aeruginosa*  
107 translational activity in an amino acid-rich growth environment.

108 To assess whether BONCAT is broadly suitable for labeling polymicrobial communities found  
109 in the CF airways, we then performed mixed activity labeling as described above on representative  
110 isolates of *Achromobacter xylosoxidans*, *Burkholderia cenocepacia*, *Escherichia coli*, *Fusobacterium*  
111 *nucleatum*, *Prevotella melaninogenica*, *Rothia mucilaginosa*, *Staphylococcus aureus*,  
112 *Stenotrophomonas maltophilia*, *Streptococcus parasanguinis*, and *Veillonella parvula* (Fig. 2). Each  
113 mixed culture (+/- antibiotics in a 1:1 ratio) exhibited a similar labeling pattern to *P. aeruginosa*,  
114 suggesting that BONCAT can be used to characterize translational activity among diverse bacterial  
115 taxa associated with the CF airways. Importantly, BONCAT labeling did not affect the growth  
116 phenotype of any species under our experimental conditions (Supplementary Fig. 3), consistent with  
117 previous studies showing that BONCAT permits labeling of microbiota without concomitant changes in  
118 growth rate or protein expression (36,44).

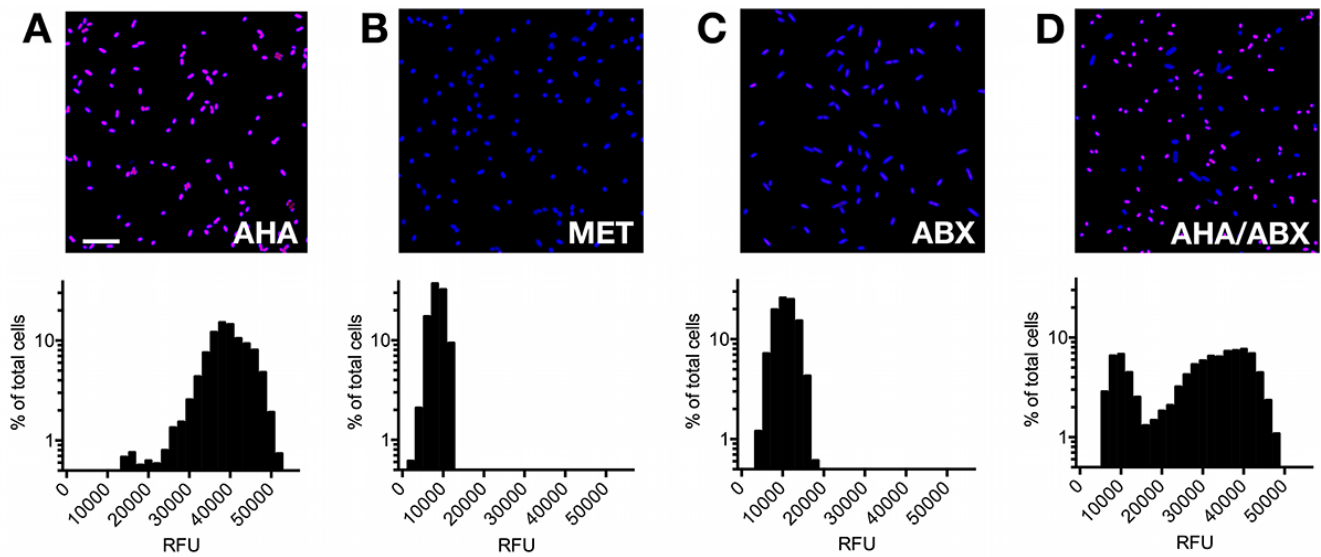

119 **Fig. 1** BONCAT labeling of *P. aeruginosa* differentiates translationally active and inactive cells. *P. aeruginosa* was incubated  
120 in the presence of (a) AHA, (b) methionine (MET), and (c) antibiotics prior to AHA (ABX). Actively growing cells were identified  
121 via strain-promoted 'click' chemistry (Cy5, magenta; SYTO64, blue). Histograms associated with each image represent  
122 average Cy5 pixel intensity (relative fluorescence units, RFU) per cell. (d) Two AHA-treated cultures (one with antibiotics, one  
123 without) were mixed in a 1:1 ratio prior to Cy5-DBCO labeling. These data demonstrate that BONCAT can differentiate  
124 translationally active and inactive bacterial cells in a complex nutritional milieu. Scale bar = 10 $\mu$ m.  
125

126

127

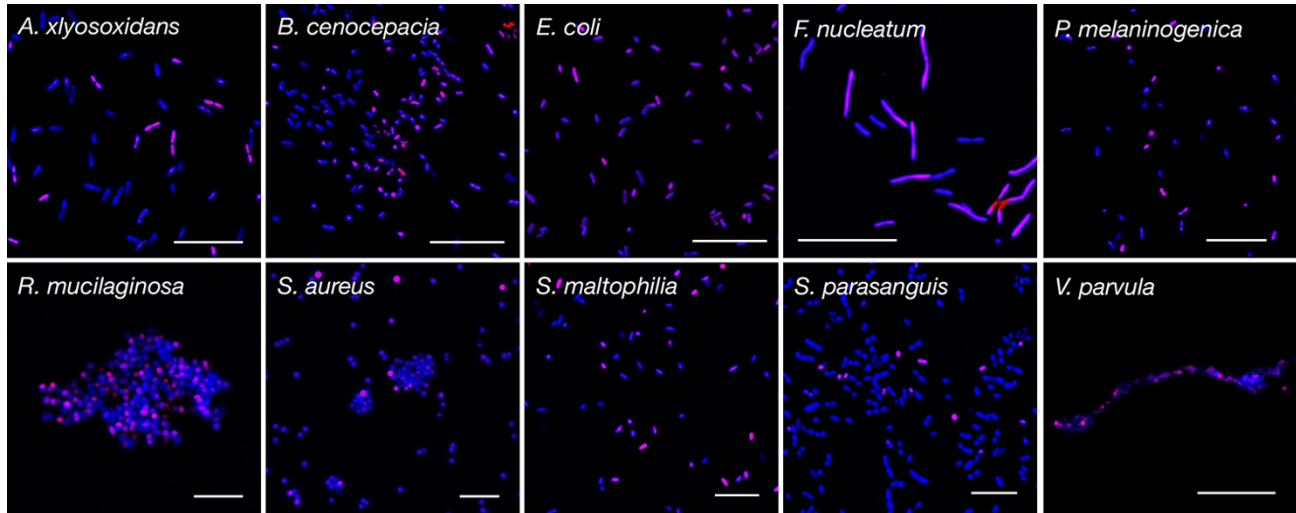

128

129 **Fig. 2** BONCAT can identify active cells among diverse CF microbiota. Two cultures (one treated with antibiotics, one without)  
130 of each species were grown in the presence of AHA and mixed 1:1 prior to Cy5-DBCO (magenta) labeling and SYTO64  
131 counterstaining (blue). These data demonstrate that BONCAT can differentiate between active and inactive bacterial cells  
132 among diverse CF microbiota. Scale bars; Ax, Bc, Fn, Ec, Pm, Rm = 20 $\mu$ m; Sa, Sm, Sp = 10 $\mu$ m; Vp = 5 $\mu$ m.  
133

134 **BONCAT identification of active CF microbiota.** The BONCAT protocol developed for lab-grown  
135 cultures was then modified for analysis of CF bacterial communities *in situ*. To do so, sputum was  
136 collected and immediately supplemented with cycloheximide to reduce AHA incorporation by host  
137 cells. Samples were then divided into three equal-volume aliquots, supplemented with either AHA,  
138 methionine, or antibiotics (chloramphenicol/tetracycline/tobramycin) plus AHA, and incubated at 37°C  
139 for 3h. Incubation time was chosen to maximize labeling while minimizing changes in bacterial growth  
140 conditions such that they closely reflected the *in vivo* chemical environment. AHA concentration  
141 (6mM) was based on average methionine content in CF sputum (0.6mM)(45) and a 10:1 AHA:MET  
142 ratio (or greater) required for effective labeling (Supplementary Fig. 4).

143         Representative micrographs (Fig. 3a) reveal BONCAT labeling of bacterial cells within sputum  
144 obtained from three individual CF subjects (Supplementary Table 1, Patients 1-3). Consistent with  
145 previous reports of heterogeneous growth rates *in vivo* (25,26), notable differences in Cy5  
146 fluorescence are apparent at higher magnification (Fig. 3b); several individual cells and cell  
147 aggregates show moderate to intense labeling whereas others are unlabeled. Treatment with  
148 methionine instead of AHA did not result in fluorescent signal, ruling out non-specific labeling  
149 (Supplementary Fig. 5). Similarly, treatment of sputum with antibiotics prior to AHA addition also  
150 resulted in a significant reduction in fluorescence intensity. However, this reduction was incomplete,  
151 which may reflect the development of antimicrobial tolerance that arises among CF pathogens over  
152 time (Supplementary Fig. 5). Average pixel intensity per bacterial cell (Fig. 3c) further emphasizes the  
153 range of bacterial translational activity *in situ* and the likely slower growth rates of CF microbiota  
154 compared to cultures grown *in vitro* (compare Fig. 3c and Fig. 1a). These analyses demonstrate that  
155 BONCAT labeling can be used to characterize bacterial activity within complex sputum samples.  
156 Moreover, these data suggest that translationally-active bacteria represent only a subpopulation of the  
157 CF lung microbiota and exhibit heterogeneous growth activity *in situ*.

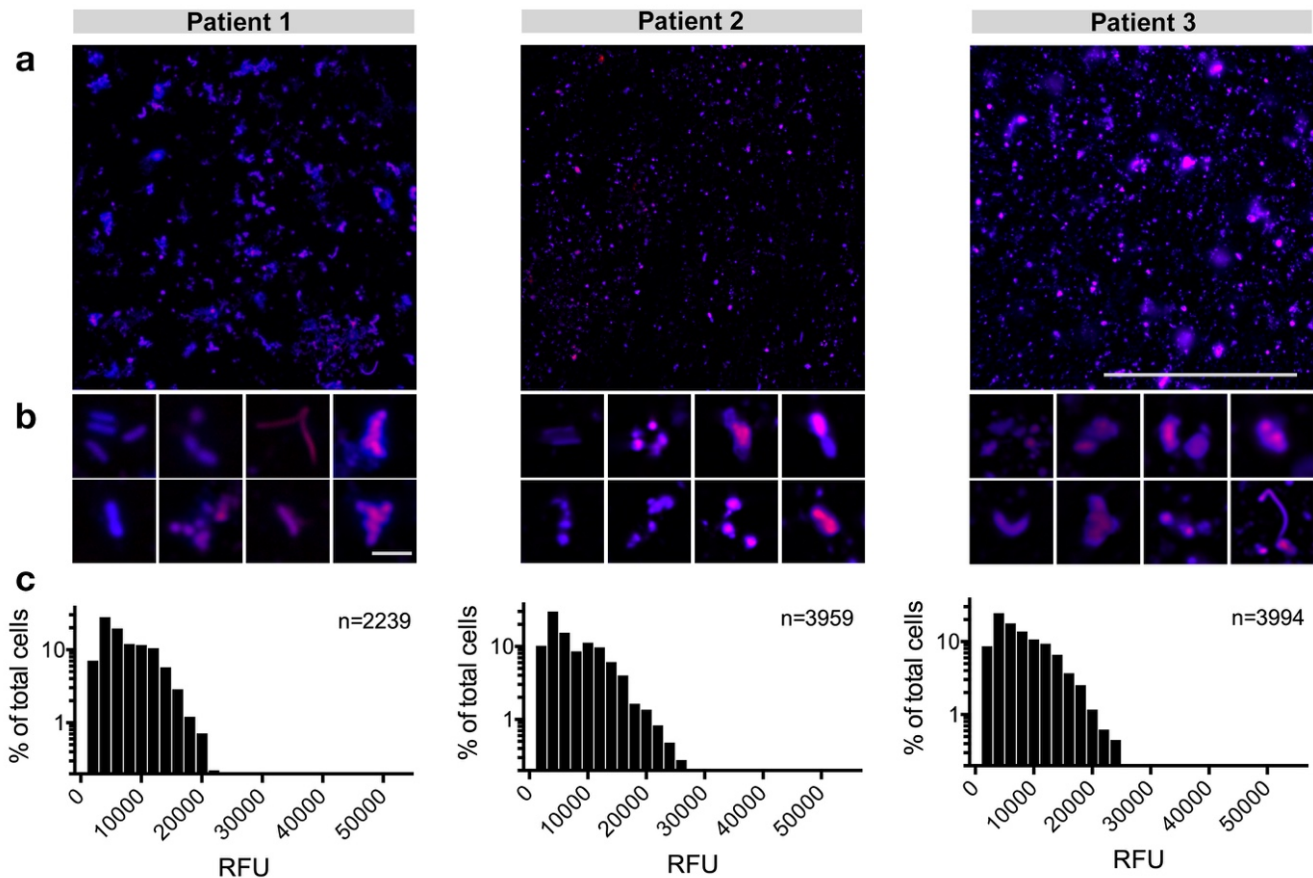

158  
159  
160  
161  
162  
163  
164  
165

**Fig. 3** CF microbiota exhibit heterogeneous translational activity within sputum. (a) Sputum was incubated in the presence of 6mM AHA immediately upon expectoration. BONCAT labeling with Cy5-DBCO (magenta) and counterstaining with SYTO64 (blue) reveals heterogeneous AHA incorporation (*i.e.* translational activity) by CF microbiota. (b) Higher magnification images further emphasize the range of bacterial activity at the single-cell level. (c) Average Cy5 pixel intensity per cell suggests slow and heterogeneous growth rates of bacterial cells *in situ*. Scale bars; a = 100 $\mu$ m, b = 5 $\mu$ m.

166

### 167 **Flow cytometric analysis of BONCAT labeled CF microbiota.** BONCAT combined with

168 fluorescence-activated cell sorting (FACS) has previously been used to study microbial activity within  
169 soils and marine sediments (35,38). We therefore sought to use FACS to characterize and isolate  
170 BONCAT labeled (*i.e.* active) cells within sputum samples derived from clinically stable CF subjects at  
171 various stages of disease (Supplementary Table 1, patients 4-7). Our experimental workflow is shown  
172 in Figure 4. Upon sputum collection, a small aliquot (“original”) was removed and stored at -80°C prior  
173 to conventional 16S rRNA amplicon analysis. The remaining sample was then supplemented with  
174 AHA for 3h, subjected to Cy5-DBCO labeling and counterstained, followed by removal of another  
175 aliquot (“sort input”) that was used to determine community profile changes as a result of sputum



176 incubation *ex vivo*. The remaining sample was then homogenized and filtered to remove host cells,  
177 followed by FACS to isolate Cy5- (“sort negative”) and Cy5+ (“sort positive”) cells. Sort integrity was  
178 validated by immunostaining using an anti-Cy5 antibody to identify Cy5+ (*i.e.* active) cells  
179 (Supplemental Fig. 6).

180

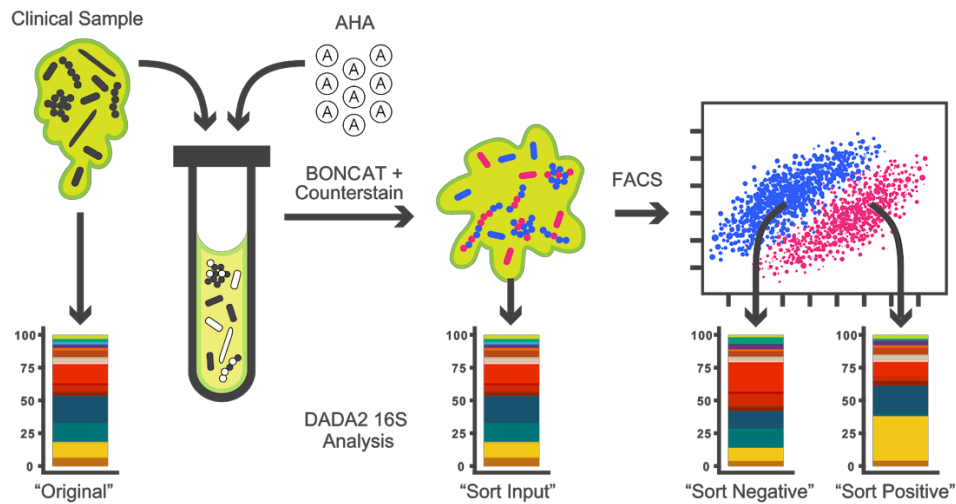

181  
182  
183  
184  
185  
186

**Fig. 4** Experimental workflow for BONCAT analysis of CF sputum.

187 BONCAT-FACS plots of CF sputum samples are shown in Figure 5a. Cy5- and Cy5+ gates  
188 were patient-specific and were established first by using an AHA- aliquot to define the negative gate  
189 for each sample. Positive gates were then conservatively assigned by comparing the AHA+ sample to  
190 the AHA- control (see Supplementary Fig. 1 for gating scheme). The AHA+ sample underwent a  
191 notable shift along the Cy5+ axis, reflective of translational activity (Fig. 5a). Cells that fell in the Cy5+  
192 gate exhibited a higher geometric mean of fluorescence intensity in the Cy5 channel (relative to the  
193 Cy5- gate), confirming BONCAT labeling (Supplementary Fig. 8). Based on fluorescent events, we  
194 generally found that only a small subset of the overall bacterial population was Cy5+ (12.1-18.5% of  
195 the parent population; Supplementary Table 2). These data reflect labeling patterns shown by  
196 microscopy (Fig. 3) and suggest that expectorated sputum harbors only a small percentage of  
translationally active cells.

197 **16S rRNA gene sequencing reveals the taxonomic identities of active CF sputum microbiota.**

198 To determine bacterial community composition, 16S rRNA gene sequencing was applied to “original”,  
199 “sort input”, “sort negative” and “sort positive” fractions from each sample. Sequence data were  
200 analyzed using the DADA2 pipeline (46) to resolve amplicon sequence variants instead of the more  
201 common approach of clustering amplicon sequences into operational taxonomic units (OTUs). DADA2  
202 reduces potential loss of meaningful biological sequence variation due to clustering by similarity and  
203 can improve the ability to observe fine-scale variation (including species-level resolution) in bacterial  
204 populations. Using this approach, sequence data derived from AHA labeled samples (“sort input”,  
205 “sort negative”, “sort positive”) were compared to their paired “original” sample to characterize the  
206 translationally active subpopulations.

207 Each subject harbored lung microbiota of moderate complexity (Fig. 5b), and community  
208 profiles were consistent with prior 16S rRNA gene surveys of CF sputum in which *Pseudomonas*,  
209 *Streptococcus*, and *Staphylococcus* were dominant genera (3-5,7-12). We also achieved species-  
210 level resolution for less abundant taxa, including several obligate and facultative anaerobes (*e.g.*  
211 *Prevotella sp.*, *F. nucleatum*). In general, AHA-labeling did not result in substantial changes in  
212 bacterial membership; for the most abundant taxa (>5%), community composition was comparable  
213 before (“original”) and after (“sort input”) BONCAT labeling, demonstrating that AHA treatment for 3h  
214 had minimal effect on relative bacterial abundance. Interestingly, bacterial populations recovered from  
215 FACS analysis (“sort negative”, “sort positive”) also showed strong similarity among the most  
216 abundant community members relative to the original sample (*i.e.* those detected by conventional  
217 sequencing). Less abundant taxa (1-5%, Supplementary Fig. 7), showed greater variation between  
218 fractions, but most were also generally detectable in both sort negative and sort positive gates.  
219 Together, these data suggest a subset of most taxa detected by conventional 16S rRNA sequencing  
220 are translationally active *in vivo*. Moreover, each taxon appears to exhibit heterogeneous growth  
221 activity that may have important implications for disease progression and patient therapy.

222 To better observe changes in the relative abundance of bacterial taxa between fractions, we  
223 calculated the log<sub>2</sub> fold change (log<sub>2</sub>fc) between “original” and “sort positive” as well as differences

224 between “sort positive” and “sort negative” for each patient (Fig. 5c, Supplementary Fig. 9). Some  
225 genera/species present in the log<sub>2</sub>fc plots do not appear in taxa plots (Fig. 5b) because they were  
226 less than 1%, but we note that activity among less abundant populations may also be a determinant of  
227 CF pathogenesis. In Patient 4 for example, *Stenotrophomonas* and *Mycobacterium sp.* together make  
228 up less than 0.04% of the overall bacterial community but were enriched ~1.7 and 1.1 log<sub>2</sub>fold in the  
229 active fraction, respectively. *Streptococcus sp.* was one of the more abundant genera in the original  
230 community (10.8%) and represented an even greater percentage of the active population (33%, or  
231 1.6-log<sub>2</sub>fold enrichment). Conversely, *R. mucilaginosa*, which was also abundant (14.4%), showed  
232 little translational activity as determined by BONCAT labeling (as it did in patients 5 and 7).

233 Patients 5-7 exhibited other notable differences in bacterial abundance between fractions (Fig.  
234 5c, Supplementary Fig. 9). In Patient 5, *Haemophilus* and *Mycobacterium* showed the greatest  
235 enrichment in the active fraction (3.2 and 1.8-log<sub>2</sub>fold enrichment, respectively) but again only made  
236 up a small percentage of the original community (0.1%). *R. mucilaginosa* and *Leptotrichia*, present at  
237 5.2% and 0.1% respectively, were at much lower abundance (3.1 and 4.0-log<sub>2</sub>fold reduction) in the  
238 active fraction. Patient 6 harbored a *Pseudomonas*-dominated (90.6%) community in which *S. aureus*  
239 was also abundant (4.4%), but the latter exhibited little translational activity (3.1-log<sub>2</sub>fold decrease)  
240 suggesting a predominantly dormant *S. aureus* population. *Stenotrophomonas* and *Streptococcus*  
241 exhibited the greatest enrichment (1.7 and 4.4-log<sub>2</sub>fold) in the active fraction of Patient 6, despite  
242 being present at low abundance. Finally, Patient 7, whose sputum contained a diverse bacterial  
243 community composed of 26 identifiable bacterial taxa, harbored an active subpopulation that was  
244 dominated by *P. aeruginosa* (74.7%, 0.7-log<sub>2</sub>fold increase) and *Streptococcus* (15.2%, no change).

245 Taken together, BONCAT data reveal the extensive heterogeneity of translational activity  
246 among CF microbiota. Each patient harbors a unique bacterial community, though community  
247 membership and relative abundance is not necessarily predictive of active growth. Ultimately, profiling  
248 of bacterial communities in this manner may help guide therapeutic strategies by identifying  
249 subpopulations of translationally active bacteria.

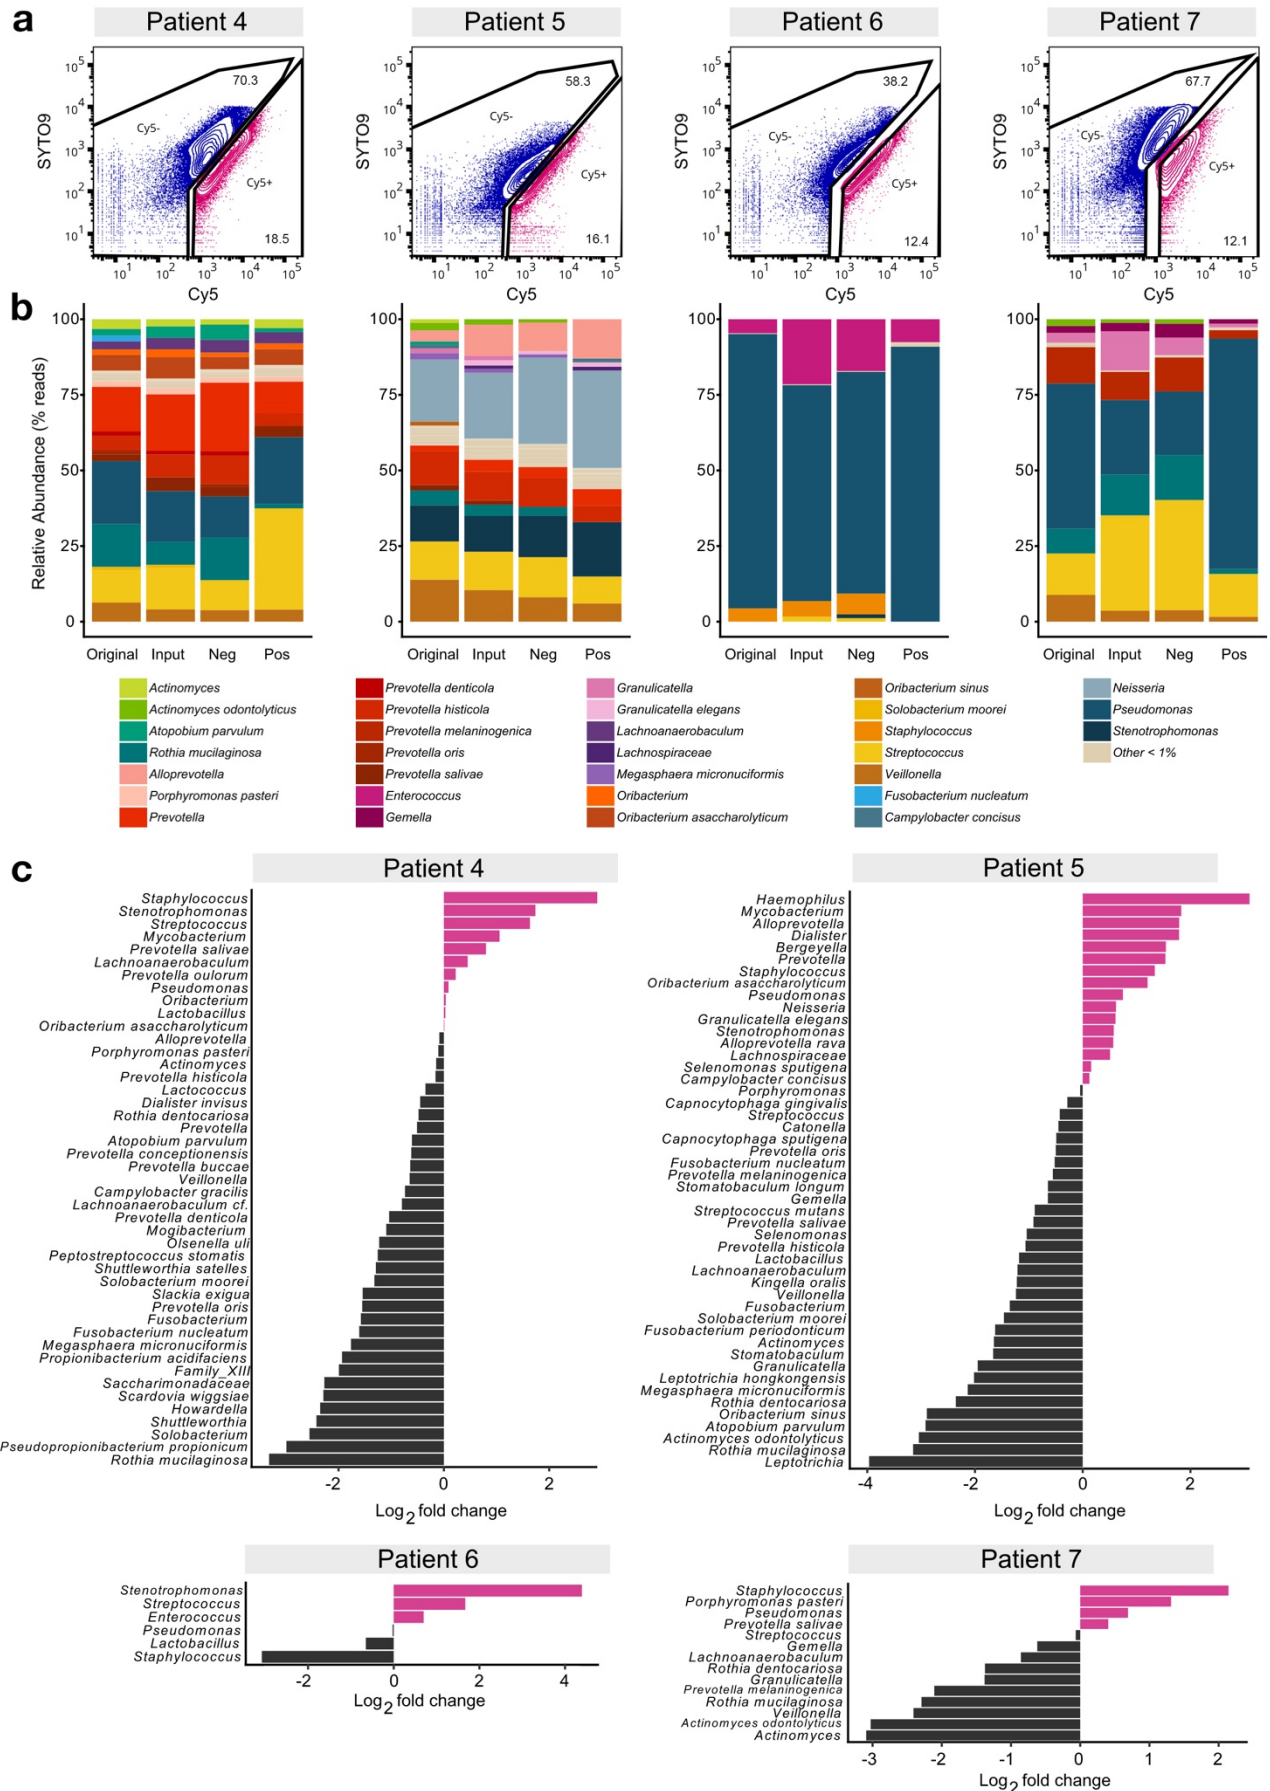

251 **Fig. 5** BONCAT labeling, FACS and 16S rRNA sequencing of CF sputum reveals the taxonomic identities of metabolically  
252 active microbiota. **(a)** FACS of BONCAT labeled sputum reveals Cy5- and Cy5+ subpopulations. Percentages shown reflect  
253 % of parent population post-CD45RO gating. **(b)** The “original”, “sort input”, “sort negative”(Cy5-), and “sort positive”(Cy5+)  
254 fractions were analyzed by 16S rRNA gene sequencing and the DADA2 algorithm. Taxa plots summarize sequencing data  
255 by patient and sorted fractions. **(c)** Log2 fold changes between relative abundances of taxa in the “sort positive” compared to  
256 the “original” fraction. Pink bars indicate taxa that were increased in relative abundance in the “sort positive” fraction,  
257 representing translationally active microbiota.  
258

## 259 **DISCUSSION**

260 16S rRNA gene sequencing has become the gold standard for culture-independent  
261 characterization of CF airway bacterial communities. Despite the wealth of data that has emerged  
262 regarding the complexity of lung microbiota, we have little understanding of *in vivo* bacterial activity  
263 and the specific contributions of individual species to pathogenesis. Expanding on recent studies  
264 employing BONCAT as a means of characterizing the ecophysiology of microbial communities in their  
265 natural growth environment (35-38), we use this approach in combination with FACS and 16S rRNA  
266 gene sequencing to shed light on bacterial activity in CF sputum. We demonstrate that only a subset  
267 of each taxon is detectable by metabolic labeling. Identification and characterization of this  
268 subpopulation is not achievable using conventional sequencing approaches and may provide a more  
269 precise representation of relevant microbiota within the CF lung.

270 BONCAT-based studies of translationally active bacteria challenge our thinking on the  
271 microbial ecology of the CF airways. Each subject harbored a unique bacterial community consisting  
272 of canonical lung pathogens (e.g. *Pseudomonas*, *Staphylococcus*, *Achromobacter*, *Mycobacterium*,  
273 *Streptococcus*). Consistent with previous studies using RNA-based methods (24,25), BONCAT-  
274 FACS-based sequencing data indicate these most abundant taxa are also active *in situ*, reinforcing  
275 their probable role in CF pathogenesis. However, we also revealed low abundance community  
276 members comprise a disproportionate percentage of the “sort positive” fraction despite a quantitatively  
277 low abundance in the overall (“original”) bacterial community. In conventional 16S rRNA datasets,  
278 ‘rare’ taxa (*i.e.* <1%) can be challenging to detect among high abundance organisms (or they are  
279 grouped into an ‘other’ category). Moreover, given the abundance of dead and/or dormant cells  
280 observed in this study (~38-70%; Supplementary Table 2), longitudinal dynamics among low  
281 abundance taxa would be masked in standard taxa plots, and may partially explain why observed

282 within-patient differences in bacterial community composition rarely track with patient symptoms  
283 (9,15-22). We hypothesize that low abundance organisms represent keystone members of the lung  
284 microbiota, whose *in vivo* activity dynamics are determinants of acute inflammation, either by directly  
285 impacting the host, or indirectly through modulating the growth and virulence of higher abundance  
286 pathogens.

287         BONCAT imaging of sputum and log<sub>2</sub>fc plots between positive and negative gates  
288 demonstrated both population-wide and taxon-specific translational heterogeneity. This spectrum of  
289 translational activity may confer a significant advantage for bacteria and optimize their fitness in the  
290 complex environment of the CF lung. Airway microbiota face a dynamic milieu shaped by microbial  
291 competitors, antimicrobials, the host immune response, nutrient limitation and other chemical stimuli  
292 that can be unfavorable to growth. Under these conditions, adopting a ‘bet hedging’ strategy in which  
293 only a subpopulation of cells is active may ensure that a given bacterial species is prepared to  
294 contend with environmental stress (47). In addition, the transition between translationally active and  
295 dormant states may help explain the periodicity of PEx; faced with a favorable growth environment,  
296 more cells of a given taxon (or taxa) may be induced into active growth and elicit a heightened patient  
297 response.

298         The balance between growth states may also be a critical determinant of patient response to  
299 therapy. By adopting a ‘persister’-like strategy in which reduced cellular activity confers a temporary  
300 multidrug-resistant phenotype, a dormant subpopulation could ensure persistence during an antibiotic  
301 challenge. Once antibiotic selective pressure is relieved, antimicrobial tolerant populations may  
302 emerge. This heterogeneity may also help explain instances where a patient’s clinical response is not  
303 predicted by the *in vitro* drug susceptibility of a given pathogen. We posit that clinical sensitivity panels  
304 are poorly predictive of antibiotic efficacy because they do not account for the heterogeneous *in situ*  
305 translational activity described here.

306         While active cells are likely more responsible for pathogenesis, inactive cells (Cy5-) are also of  
307 importance to CF lung disease as bacteria do not necessarily have to be translationally active to  
308 influence their greater community. For example, it is known that largely dormant populations can drive

309 geochemical processes in their growth environment (e.g. mineralizing organic C to CO<sub>2</sub>)(48).  
310 Translationally inactive cells can also shape their growth environment through nutrient exchange,  
311 secretion of virulence factors and small metabolites, electrostatic interactions, and stimulation of the  
312 host immune response. Further characterization of *in situ* activity heterogeneity, the contributions of  
313 both active and dormant populations to disease, the frequency of transition between states and the  
314 factors that stimulate those transitions will help us better understand disease dynamics.

315         Though BONCAT represents a useful tool for the study of CF microbiota, there are notable  
316 limitations. First, bacterial cell sorting by flow cytometry is imperfect, as each species has  
317 characteristic sort properties. When defining our gating scheme, Cy5+ and Cy5- gates were  
318 conservatively selected (requiring a gap in between gates) such that the selection of “inactive” cells in  
319 the positive gate is minimized, and vice versa. However, with this gap a subset of the active  
320 population is not collected. Similarly, there is a high probability of selecting “active” cells in the  
321 negative gate due to flow migration characteristics (e.g. *F. nucleatum* shifts differently than a much  
322 smaller *V. parvula* cell). Finally, bacterial aggregates, in which only some cells are active (see Fig. 3b)  
323 could be pulled into the negative gate by the inactive population of that aggregate. We are currently  
324 exploring alternative approaches to improve upon the sorting efficiency of BONCAT labeled cells.

325         It is also possible BONCAT is selective against certain taxa. While sputum chemistry is stable  
326 over time *ex vivo* (43), it is notable that after AHA incubation, patients 4, 5, and 7 had a decrease in  
327 abundance of facultative and obligately anaerobic taxa (e.g. *Fusobacterium*, *Veillonella* and *Rothia*) in  
328 “sort positive” fractions relative to the original sample (Fig. 5c). However, this was not always the case  
329 (e.g. some species of *Prevotella* and *Porphyromonas* increased) making it difficult to determine  
330 whether the observed log<sub>2</sub> fold changes reflect growth constraints during BONCAT labeling or a true  
331 slow growth (or dormant) phenotype. Though each bacterium tested *in vitro* demonstrated the ability  
332 to uptake AHA (Fig. 2), it is expected that each species will incorporate AHA into new proteins at  
333 different rates. Future work will be aimed at optimizing reaction conditions and incubation times to  
334 minimize the effect of the experimental approach biasing FACS and sequencing data.

335           Despite these limitations, BONCAT can be used to extend our understanding of the role of  
336 specific microbiota in CF lung disease. Here we focused on a cross-sectional cohort of stable  
337 subjects, but the approach can be used to address important questions about microbial community  
338 dynamics over time. For example, (1) how do active populations vary with disease state? Future  
339 studies will focus on longitudinal analyses of within-subject microbial dynamics and how active  
340 species correlate with patient symptoms. By identifying bacterial subpopulations most active either  
341 preceding or during an acute disease flare (*i.e.* PEx), more effective therapeutic strategies are likely to  
342 be identified. (2) Why are only some patients responsive to antimicrobial therapy? As mentioned  
343 above, *in vivo* drug efficacy is often inconsistent with clinical sensitivity panels. By obtaining sputum  
344 and amending small aliquots with different classes of antibiotics, BONCAT analysis of the ensuing  
345 changes in bacterial activity can be used to predict how CF subjects might respond to treatment. (3)  
346 How do specific taxa respond to environmental stimuli? It is known that bacteria are dynamically  
347 responsive to their growth environment, yet how CF microbiota adapt to perturbations in the sputum  
348 milieu is poorly understood. BONCAT characterization of sputum samples amended with specific  
349 nutrients or incubation under varying environmental conditions (*e.g.* low pH) will help shed light on  
350 parameters that constrain or potentiate bacterial growth *in vivo*. (4) How is translational activity  
351 spatially arranged? With the exception of small bacterial aggregates (Fig. 3), the approach described  
352 here offers limited insight on the spatial distribution of bacterial activity. As an alternative to FACS-  
353 based sequencing, BONCAT could be combined with fluorescent *in situ* hybridization (FISH) methods  
354 and histological analysis of sputum (or lung tissue) to visualize spatial relationships between actively  
355 growing bacteria.

356           In summary, we demonstrate that BONCAT is a powerful tool for the visualization and  
357 identification of translationally active bacteria and provides a measure of microbial activity not  
358 captured by conventional molecular profiling. Our use of BONCAT lays the foundation for a more  
359 detailed understanding of the *in situ* physiology of CF microbiota and has important implications for  
360 the development of new therapeutic strategies and improved clinical outcomes. In addition, the  
361 approach is broadly applicable to other airway diseases (*e.g.* COPD, ventilator associated



362 pneumonias, and sinusitis) where the activity of complex bacterial communities is central to disease  
363 states. We are currently using this approach to study microbial community dynamics in a variety of  
364 infectious disease contexts.

365

## 366 MATERIALS AND METHODS

367 **Bacterial strains and culture conditions.** Bacterial strains are listed in Table 1. *Fusobacterium*  
368 *nucleatum*, *Prevotella melaninogenica*, *Veillonella parvula*, and *Streptococcus parasanguinis* were  
369 derived from the American Tissue Type Collection and obtained from Microbiologics (St. Cloud, MN).  
370 *Rothia mucilaginosa* was obtained from the Japan Collection of Microorganisms (Riken, Tokyo).  
371 *Staphylococcus aureus*, *Escherichia coli* and *Pseudomonas aeruginosa* were obtained from D.K.  
372 Newman (California Institution of Technology), and *Burkholderia cenocepacia* was obtained from C.H.  
373 Mohr (University of Minnesota). *Achromobacter xylosoxidans* and *Stenotrophomonas maltophilia* were  
374 isolated from patients undergoing treatment at the UMN Adult CF Center. Aerobes were maintained  
375 on Luria-Bertani (LB) agar, while anaerobes were maintained on Brain-Heart Infusion (BHI) agar  
376 supplemented with a 5% vitamin K-hemin solution (Hardy Diagnostics #Z237) in an anaerobic  
377 chamber (Coy) under a 90% N<sub>2</sub>/ 5% CO<sub>2</sub>/ 5% H<sub>2</sub> atmosphere.

378

379 **Table 1.** Bacterial strains used in this study.

380

| Bacterial Species                   | Comment                     | Source     |
|-------------------------------------|-----------------------------|------------|
| <i>Achromobacter xylosoxidans</i>   | CF clinical isolate MN001   | 59         |
| <i>Burkholderia cenocepacia</i>     | CF clinical isolate K56-2   | 60         |
| <i>Escherichia coli</i>             | UQ950                       | 61         |
| <i>Fusobacterium nucleatum</i>      | ATCC 25586                  |            |
| <i>Prevotella melaninogenica</i>    | ATCC 25845                  |            |
| <i>Pseudomonas aeruginosa</i>       | Clinical isolate UCBPP-PA14 | 62         |
| <i>Rothia mucilaginosa</i>          | JCM 10910                   | 63         |
| <i>Staphylococcus aureus</i>        | Clinical isolate MN8        | 64         |
| <i>Stenotrophomonas maltophilia</i> | CF clinical isolate CHB83-1 | This study |
| <i>Streptococcus parasanguinis</i>  | ATCC 15912                  |            |
| <i>Veillonella parvula</i>          | ATCC 10790                  |            |

381

382 **Clinical sample collection.** Spontaneously expectorated sputum was collected from stable subjects  
383 with cystic fibrosis during routine outpatient visits to the Adult CF Center at the University of  
384 Minnesota. All subjects provided written informed consent prior to sample collection as approved by  
385 the UMN Institutional Review Board (Study #1403M49021). Upon consent, each patient provided a  
386 single sample that was collected in a sterile 50mL conical tube. Patient data are shown in  
387 Supplementary Table 1.

388 **Bioorthogonal non-canonical amino acid tagging (BONCAT).** BONCAT labeling was performed  
389 as described by Hatzenpichler (35,36) with modifications. For imaging of lab-grown cultures (see  
390 below), *P. aeruginosa*, *B. cenocepacia*, *A. xylosoxidans*, *S. maltophilia*, *R. mucilaginosa*, *E. coli* and  
391 *S. aureus* were grown aerobically in LB, while *S. parasanguinis*, *V. parvula*, *P. melaninogenica* and *F.*  
392 *nucleatum* were cultured under anaerobic conditions in BHI broth supplemented with hemin and  
393 vitamin K. Cultures were grown overnight and diluted 1/100 in 10mL of fresh medium. Upon reaching  
394 mid-log phase, cultures were supplemented with either 6mM AHA or 6mM methionine (MET) and  
395 incubated for 3h at 37°C. When indicated, an antibiotic cocktail consisting of chloramphenicol  
396 (30µg/mL), tetracycline (200µg/mL) and tobramycin (10µg/mL) was added 30 minutes prior to AHA  
397 addition to arrest protein synthesis. After incubation, cultures were pelleted via centrifugation (5 min at  
398 10,000 x g), fixed in 4% paraformaldehyde (PFA) for 2h at 4°C, resuspended in phosphate buffered  
399 saline (PBS, pH 7.4) and stored at 4°C.

400 Patient sputum samples used for imaging were treated with cycloheximide (100µg/mL) upon  
401 expectoration and divided into three equal volumes. Aliquots were supplemented with either AHA  
402 (6mM), methionine (6mM), or AHA (6mM) with chloramphenicol/tetracycline/tobramycin as described  
403 above, incubated at 37°C for 3h, followed by fixation in 4% PFA overnight at 4°C. Samples collected  
404 for flow cytometry were divided into three 500µL aliquots. One control aliquot was immediately frozen  
405 at -80°C and later used for conventional 16S rRNA gene sequencing. Cycloheximide (100µg/mL) was  
406 added to the remaining two aliquots, one of which was supplemented with AHA (6mM) and incubated  
407 at 37°C for 3h. Labeled samples (and unlabeled controls) were then fixed in 4% PFA for 2h, pelleted

408 via centrifugation (5 min at 10,000 x g), resuspended in PBS, stored at 4°C and further processed  
409 within 24h.

410 **Click chemistry.** For each bacterial culture and sputum sample, strain-promoted azide-alkyne  
411 cycloaddition ('click' chemistry) (49) was also performed as described previously (36). Briefly, fixed  
412 biomass was pelleted, resuspended in freshly prepared 2-chloroacetamide (100mM) and incubated  
413 for 1h at 46°C, shaking at 450rpm in the dark. Cy5-dibenzocyclooctyne (Cy5-DBCO) (Click Chemistry  
414 Tools) was then added to a final concentration of 10µM followed by incubation for 30 min at 46°C.  
415 Samples were washed three times in PBS and further processed for imaging and flow cytometry (see  
416 below).

417 **SDS-PAGE.** *P. aeruginosa* was grown to late-exponential phase as described above and  
418 supplemented with varying concentrations of AHA (100µM to 1mM) for 1h prior to fixation. Similarly,  
419 *P. aeruginosa* was grown in the presence of varying ratios of MET:AHA. Bacterial pellets were  
420 resuspended in extraction buffer (1% sodium dodecyl sulfate, 50mM NaCl, 100mM EDTA, 1mM MgCl<sub>2</sub>  
421 at pH 8.4) and boiled for 30 min. After boiling, samples underwent click chemistry as described above.  
422 A mixture of methanol:chloroform:water (12:3:8) was then added to each sample followed immediately  
423 by centrifugation for 5 min at 16,000 x g. The water/methanol phase was then carefully removed, and  
424 protein recovered from the interface was washed 3 times in 100% methanol. After the final wash,  
425 supernatant was removed and pellets were air dried. Protein was resuspended in 100µl 1X LDS  
426 (lithium dodecyl sulfate) sample buffer and denatured at 70°C for 10 minutes. 10µl of protein was run  
427 on an 8% Bis-Tris gel with MOPS (3-(*N*-morpholino)propanesulfonic acid)-sodium dodecyl sulfate  
428 (SDS) running buffer to which sodium bisulfite had been freshly added. Gels were run at 150V, fixed  
429 for 30 min in a 1:2:7 acetate:methanol:water mix, and imaged with a Typhoon FLA 9500 scanner (GE  
430 Healthcare) using an excitation wavelength of 635nm.

431 **Fluorescence microscopy.** BONCAT labeled bacterial cultures and sputum were spotted on  
432 Superfrost Plus microscope slides and counterstained using 1.6µM STYO64 in PBS. Slides were then  
433 washed twice in PBS, mounted using Prolong Diamond Antifade and imaged using an Olympus IX83  
434 microscope with a transmitted Koehler illuminator and a 60X oil objective lens (NA 1.42). Images were

435 captured on a Hamamatsu ORCA-Flash4.0 V2 digital CMOS camera, and post-acquisition image  
436 analysis was performed using cellSens software (v.1.14, Olympus). SYTO64 and Cy5 were visualized  
437 using excitation/emission wavelengths of 562nm/583nm and 628/640nm, respectively.

438 Image analysis was performed using FIJI (50). Briefly, images were subjected to background  
439 subtraction using a rolling ball radius of 150 pixels. Individual cells were identified by adjusting  
440 thresholds of SYTO64 images using Huang's fuzzy thresholding method (51). Images were also  
441 segmented using a watershedding algorithm that assumes each maximum belongs to a discrete  
442 particle. The '*Analyze Particles*' operation was used to detect and record locations of individual  
443 bacterial cells in a given image. For clinical samples, particles were constrained between 100-1000  
444 pixels to minimize detection of host cells and sputum debris. Mean pixel intensity at 647nm (Cy5) was  
445 then quantified for each assigned particle. Imaging experiments were performed in triplicate for each  
446 bacterial species, and twenty images for each sample were captured ( $n > 2700$  particles per sample).

447 **Flow Cytometry.** Prior to sorting, Cy5-DBCO labeled sputum was collected by centrifugation and  
448 counterstained with 1.6 $\mu$ M SYTO9 (Invitrogen) in PBS for 30 min. Sputum samples were also stained  
449 with 1  $\mu$ g/ml of PE anti-human CD45RO in PBS (BioLegend) for 30 min to stain activated and memory  
450 T cells, some B cell subsets, activated monocytes/macrophages, and granulocytes. All samples were  
451 washed in PBS, homogenized using 16- and 22-gauge needles and filtered through a 40 $\mu$ m cell  
452 strainer. To separate AHA+ and AHA- bacterial populations, clinical samples were analyzed and  
453 sorted on a FACSAriaIIu Cell Sorter (Beckton Dickinson) with a 70 $\mu$ m nozzle at 70psi. Contaminating  
454 human leukocytes staining positive for PE anti-human CD45RO were excluded from bacterial  
455 populations of interest in the initial sorting gate (Supplementary Fig. 1). An AHA- control was then  
456 matched to each sample to determine the level of non-specific Cy5-DBCO binding and was used to  
457 establish Cy5+ (*i.e.* active) and Cy5- (*i.e.* inactive) sorting gates. Forward scatter and side scatter  
458 gates were then applied to remove large particulates and debris, and liberal doublet discrimination  
459 was used to minimize loss of bacterial aggregates. Collected samples were stored at 4°C and  
460 processed within 24h. FlowJo software (v.10.5.0) was used for data analysis and presentation.

461 Cy5+ and Cy5- sorted populations were assessed for post-sort purity by flow cytometry, while  
462 collected fractions were visualized by anti-Cy5 immunostaining. To do so, BONCAT labeled sputum  
463 samples were spread across Superfrost Plus microscope slides using a sterile pipette tip and allowed  
464 to air dry for 30 min. Slides were washed 3X in PBS and blocked using 1% goat serum in PBS for 1h,  
465 followed by treatment with an anti-Cy5 monoclonal antibody (C1117, Sigma-Aldrich)(1:100 dilution) in  
466 incubation buffer (1% goat serum, 0.3% Triton X100 and 10mg/mL bovine serum albumin) overnight  
467 at 4°C. Slides were washed 3X, and incubated with Alexa Fluor 488 goat anti-mouse secondary  
468 antibody (1:250) in incubation buffer for 45 min. Slides were washed 2X, counterstained using 0.1%  
469 DAPI in PBS and mounted using Prolong Diamond Antifade. Slides were imaged as described above.

470 **DNA extraction.** Genomic DNA (gDNA) was extracted using a modified phenol-chloroform method  
471 previously described (52). Briefly, FACS-sorted samples were collected onto 0.22µm polycarbonate  
472 membranes (EMD Millipore), which were then transferred to 1 mL of TENS buffer (50mM Tris-HCl [pH  
473 8.0], 20mM EDTA, 100mM NaCl, 1% SDS) containing lysozyme (0.2mg/mL) and lysostaphin  
474 (0.02µg/mL) and incubated at 37°C for 30 min. Sodium dodecyl sulfate (SDS) and proteinase K were  
475 added to final concentrations of 1% and 1.2mg/mL, respectively, and samples were incubated  
476 overnight at 55°C. Enzymes were deactivated by incubating samples at 90°C for 30 min, and sample  
477 liquid (including membrane) was transferred to a 5mL conical tube containing an equal volume of  
478 phenol:chloroform:isoamyl alcohol (P:C:I, 25:24:1, pH 7.9), which dissolved the membrane. The  
479 resulting sample was then split into two Lysing Matrix E tubes (MP Biomedicals) and processed twice  
480 by bead beating for 30 seconds. Contents of both tubes were recombined and centrifuged at 3,200 x  
481 g for 20 min. The aqueous layer was transferred to a new tube and P:C:I extraction was repeated,  
482 followed by a chloroform:isoamyl alcohol (24:1) extraction. A 1/10th volume of sodium acetate (3M,  
483 pH 5.2) was then added and nucleic acid was precipitated using one volume of isopropanol followed  
484 by centrifugation at 21,130 x g for 20 min. Supernatant was removed, the pellet was washed with 80%  
485 ethanol, and centrifuged at 21,130 x g for 10 min. Finally, the gDNA pellet was air dried, resuspended  
486 in 10mM Tris buffer (pH 8.0), and stored at -80°C until sequencing.

487 **DNA sequencing and analysis.** gDNA derived from sputum samples was submitted to the University

488 of Minnesota Genomics Center (UMGC) for 16S rRNA gene library preparation using a two-step PCR  
489 protocol described previously (53). The V4 region was amplified and sequenced on an Illumina MiSeq  
490 using TruSeq (v.3) 2x300 paired-end technology. FACS sheath fluid and DNA extraction reagent  
491 control samples were also submitted for sequencing. These control samples did not pass quality  
492 control steps due to DNA content below detection thresholds but were incorporated into downstream  
493 analyses. An average of 52,155 sequences per sample were obtained across two sequencing runs.  
494 The ‘DADA2’ R package (v.1.2.1) (46) was used to trim and filter sequences, model and correct  
495 Illumina sequence errors, align paired-end sequences, and filter chimeric reads. Specifically, the first  
496 20 bases from each sequence were trimmed to remove primer sequences. Forward and reverse  
497 sequences were trimmed to 200 bases, maintaining Phred quality scores above 30. All other DADA2  
498 pipeline parameters were run using default options. The resulting amplicon sequence variants (ASVs)  
499 were assigned taxonomy using RDP classifier (54) and the SILVA SSU database (Release 132, Dec.  
500 2017)(55,56). The ‘Decontam’ package (v.1.2.0) (57) was used with 16S qPCR data obtained from  
501 the UMGc QC protocol to identify sequences that were likely to be processing contaminants. A total  
502 of 31 taxa were removed from the dataset based on frequency and prevalence in the sample when  
503 compared with DNA extraction and FACS sheath fluid controls. An average of 41,642 sequences per  
504 sample were recovered from ‘DADA2’/‘Decontam’ analysis corresponding to 192 unique taxonomic  
505 assignments with 76 unambiguously assigned at the species level.

506 ASV count data and taxonomic assignment were used within the analysis framework of the  
507 ‘Phyloseq’ R package (v.1.26.0) (58). ASVs were filtered when they did not belong to the domain  
508 Bacteria, or when not assigned taxonomy at the phylum level. Phyla that had low prevalence and  
509 abundance (including Verrucomicrobia, Acidobacteria, Deinococcus-Thermus, and Cyanobacteria)  
510 were removed from the dataset, as were singleton ASVs. After filtering there remained 105 unique  
511 taxonomic assignments with 59 unambiguously assigned at the species level. Log<sub>2</sub> fold differences in  
512 relative abundance for each taxon were calculated between the “original”, “sort negative” and “sort  
513 positive” fractions for each study subject. Taxa that appeared either in the original or positive sort, but  
514 not both were excluded from the dataset. To test whether our log<sub>2</sub> fold difference analysis was

515 affected by the number of sequences per sample, we also performed this analysis with rarified data  
516 and did not observe changes in results. For all figures, a specific epithet was used when assigned  
517 exactly from the SILVA database using the lowest possible taxonomic assignment (*i.e.* genus or  
518 species).

519 **Data Availability.** Raw 16S rRNA gene sequence data (Fig. 5 and Supplementary Figures 7 and 9)  
520 were deposited as fastq files in the NCBI sequence read archive under Bioproject ID PRJNA520921.

521

522 **REFERENCES**

- 523 1. Rajan, S. & Saiman, L. Pulmonary infections in patients with cystic fibrosis. *Semin. Respir. Infect.* **17**,  
524 47-56 (2002). DOI: 10.1053/srin.2002.31690.
- 525 2. Cystic Fibrosis Foundation. Patient registry 2017 annual data report. [online], (2018).
- 526 3. Rogers, G. B. *et al.* Characterization of bacterial community diversity in cystic fibrosis lung infections by  
527 use of 16S ribosomal DNA terminal restriction fragment length polymorphism profiling. *J. Clin. Microbiol.*  
528 **42**, 5176-5183 (2004). DOI: 10.1128/JCM.42.11.5176-5183.2004.
- 529 4. Harris, J. K. *et al.* Molecular identification of bacteria in bronchoalveolar lavage fluid from children with  
530 cystic fibrosis. *Proc. Natl. Acad. Sci. USA* **104**, 20529-20533 (2007). DOI: 10.1073/pnas.0709804104.
- 531 5. Filkins, L. M. & O'Toole, G. A. Cystic fibrosis lung infections: polymicrobial, complex, and hard to treat.  
532 *PLoS Pathog.* **11**, e1005258 (2015). DOI: 10.1371/journal.ppat.1005258.
- 533 6. Caverly, L. J. & LiPuma, J. J. Good cop, bad cop: anaerobes in cystic fibrosis airways. *Eur. Resp. J.* **52**,  
534 1801146 (2018). DOI: 10.1183/13993003.01146-2018.
- 535 7. Cox, M. J. *et al.* Airway microbiota and pathogen abundance in age-stratified cystic fibrosis patients.  
536 *PLoS One* **5**, e11044 (2010). DOI: 10.1371/journal.pone.0011044.
- 537 8. Klepac-Ceraj, V. *et al.* Relationship between cystic fibrosis respiratory tract bacterial communities and  
538 age, genotype, antibiotics and *Pseudomonas aeruginosa*. *Environ. Microbiol.* **12**, 1293-1303 (2010).  
539 DOI: 10.1111/j.1462-2920.2010.02173.x.
- 540 9. Carmody, L. A. *et al.* Changes in cystic fibrosis airway microbiota at pulmonary exacerbation. *Ann. Am.*  
541 *Thorac. Soc.* **10**, 179-187 (2013). DOI: 10.1513/AnnalsATS.201211-107OC.
- 542 10. Carmody, L. A. *et al.* Fluctuations in airway bacterial communities associated with clinical states and  
543 disease stages in cystic fibrosis. *PLoS One* **13**, e0194060 (2018). DOI: 10.1371/journal.pone.0194060.
- 544 11. Stressmann, F. A. *et al.* Long-term cultivation-independent microbial diversity analysis demonstrates  
545 that bacterial communities infecting the adult cystic fibrosis lung show stability and resilience. *Thorax*  
546 **67**, 867-873 (2012). DOI: 10.1136/thoraxjnl-2011-200932.
- 547 12. Muhlebach, M. S. *et al.* Initial acquisition and succession of the cystic fibrosis lung microbiome is  
548 associated with disease progression in infants and preschool children. *PLoS Pathog.* **14**, e1006798  
549 (2018). DOI: 10.1371/journal.ppat.1006798.



- 550 13. Caverly, L. J., Zhao, J. & LiPuma, J. J. Cystic fibrosis lung microbiome: opportunities to reconsider  
551 management of airway infection. *Pediatr. Pulmonol.* **50**, S31-S38 (2015). DOI: 10.1002/ppul.23243.
- 552 14. Conrad, D. *et al.* Cystic fibrosis therapy: a community ecology perspective. *Am. J. Respir. Cell. Mol.*  
553 *Biol.* **48**, 150-156 (2013). DOI: 10.1165/rcmb.2012-0059PS.
- 554 15. Fodor, A. A. *et al.* The adult cystic fibrosis airway microbiota is stable over time and infection type, and  
555 highly resilient to antibiotic treatment of exacerbations. *PLoS One* **7**, e45001 (2012). DOI:  
556 10.1371/journal.pone.0045001.
- 557 16. Stressmann, F. A. *et al.* Does bacterial density in cystic fibrosis sputum increase prior to pulmonary  
558 exacerbation?. *J. Cyst. Fibros.* **10**, 357-365 (2011). DOI: 10.1016/j.jcf.2011.05.002
- 559 17. Reid, D. W., Latham, R., Lamont, I. L., Camara, M. & Roddam, L. F. Molecular analysis of changes in  
560 *Pseudomonas aeruginosa* load during treatment of a pulmonary exacerbation in cystic fibrosis. *J. Cyst.*  
561 *Fibros.* **12**, 688-699 (2013). DOI: 10.1016/j.jcf.2013.03.008.
- 562 18. Lam, J. C., Somayaji, R., Surette, M. G., Rabin, H. R. & Parkins, M. D. Reduction in *Pseudomonas*  
563 *aeruginosa* sputum density during a cystic fibrosis pulmonary exacerbation does not predict clinical  
564 response. *BMC Infect. Dis.* **15**, 145 (2015). DOI: 10.1186/s12879-015-0856-5.
- 565 19. Sibley, C. D. *et al.* A polymicrobial perspective of pulmonary infections exposes an enigmatic pathogen  
566 in cystic fibrosis patients. *Proc. Natl. Acad. Sci. USA* **105**, 15070-15075 (2008). DOI:  
567 10.1073/pnas.0804326105.
- 568 20. Carmody, L. A. *et al.* The daily dynamics of cystic fibrosis airway microbiota during clinical stability and  
569 at exacerbation. *Microbiome* **3**, 12 (2015). DOI: 10.1186/s40168-015-0074-9.
- 570 21. Price, K. E. *et al.* Unique microbial communities persist in individual cystic fibrosis patients throughout a  
571 clinical exacerbation. *Microbiome* **1**, 27 (2013). DOI: 10.1186/2049-2618-1-27.
- 572 22. Whelan, F. J. *et al.* Longitudinal sampling of the lung microbiota in individuals with cystic fibrosis. *PLoS*  
573 *One* **12**, e0172811 (2017). DOI: 10.1371/journal.pone.0172811.
- 574 23. Grahl, N. *et al.* Profiling of bacterial and fungal microbial communities in cystic fibrosis sputum using  
575 RNA. *mSphere* **3**, e00292-18 (2018). DOI: 10.1128/mSphere.00292-18.
- 576 24. Rogers, G. B. *et al.* Bacterial activity in cystic fibrosis lung infections. *Respir. Res.* **6**, 49 (2005). DOI:  
577 10.1186/1465-9921-6-49.

- 578 25. Kopf, S. H. *et al.* Trace incorporation of heavy water reveals slow and heterogeneous pathogen growth  
579 rates in cystic fibrosis sputum. *Proc. Natl. Acad. Sci. USA* **113**, E110-E116 (2016). DOI:  
580 10.1073/pnas.1512057112.
- 581 26. DePas, W. H. *et al.* Exposing the three-dimensional biogeography and metabolic states of pathogens in  
582 cystic fibrosis sputum via hydrogel embedding, clearing, and rRNA labeling. *MBio* **7**, e00796-16 (2016).  
583 DOI: 10.1128/mBio.00796-16.
- 584 27. Yang, L. *et al.* *In situ* growth rates and biofilm development of *Pseudomonas aeruginosa* populations in  
585 chronic lung infections. *J. Bacteriol.* **190**, 2767-2776 (2008). DOI: 10.1128/JB.01581-07.
- 586 28. Kragh, K. N. *et al.* Polymorphonuclear leukocytes restrict the growth of *Pseudomonas aeruginosa* in the  
587 lungs of cystic fibrosis patients. *Infect. Immun.* **82**, 4477-4486 (2014). DOI: 10.1128/IAI.01969-14.
- 588 29. Radlinski, L. *et al.* *Pseudomonas aeruginosa* exoproducts determine antibiotic efficacy against  
589 *Staphylococcus aureus*. *PLoS Biol.* **15**, e2003981 (2017). DOI: 10.1371/journal.pbio.2003981.
- 590 30. Korgaonkar, A., Trivedi, U., Rumbaugh, K. P. & Whiteley, M. Community surveillance enhances  
591 *Pseudomonas aeruginosa* virulence during polymicrobial infection. *Proc. Natl. Acad. Sci. USA* **110**,  
592 1059-1064 (2013). DOI: 10.1073/pnas.1214550110.
- 593 31. Duan, K., Dammel, C., Stein, J., Rabin, H. & Surette, M. G. Modulation of *Pseudomonas aeruginosa*  
594 gene expression by host microflora through interspecies communication. *Mol. Microbiol.* **50**, 1477-1491  
595 (2003). DOI: 10.1046/j.1365-2958.2003.03803.x.
- 596 32. Hoffman, L. R. *et al.* Selection for *Staphylococcus aureus* small-colony variants due to growth in the  
597 presence of *Pseudomonas aeruginosa*. *Proc. Natl. Acad. Sci. USA* **103**, 19890-19895 (2006).  
598 DOI:10.1073/pnas.0606756104.
- 599 33. Sibley, C. D. *et al.* A polymicrobial perspective of pulmonary infections exposes an enigmatic pathogen  
600 in cystic fibrosis patients. *Proc. Natl. Acad. Sci. USA* **105**, 15070-15075 (2008). DOI:  
601 10.1073/pnas.0804326105.
- 602 34. Venkataraman, A., Rosenbaum, M. A., Werner, J. J., Winans, S. C. & Angenent, L. T. Metabolite  
603 transfer with the fermentation product 2,3-butanediol enhances virulence by *Pseudomonas aeruginosa*.  
604 *ISME J.* **8**, 1210-1220 (2014). DOI: 10.1038/ismej.2013.232.

- 605 35. Hatzenpichler, R. *et al.* Visualizing *in situ* translational activity for identifying and sorting slow-growing  
606 archaeal–bacterial consortia. *Proc. Natl. Acad. Sci. USA* **113**, E4069–E4078 (2016). DOI:  
607 10.1073/pnas.1603757113.
- 608 36. Hatzenpichler, R. *et al.* *In situ* visualization of newly synthesized proteins in environmental microbes  
609 using amino acid tagging and click chemistry. *Environ. Microbiol.* **16**, 2568–2590 (2014). DOI:  
610 10.1111/1462-2920.12436.
- 611 37. Pasulka, A. L. *et al.* Interrogating marine virus–host interactions and elemental transfer with BONCAT  
612 and nanoSIMS-based methods. *Environ. Microbiol.* **20**, 671–692 (2018). DOI: 10.1111/1462-  
613 2920.13996.
- 614 38. Couradeau, E. *et al.* Study of Oak Ridge soils using BONCAT–FACS–Seq reveals that a large fraction of  
615 the soil microbiome is active. Preprint at <https://www.biorxiv.org/content/10.1101/404087v2> (2018).
- 616 39. Babin, B. M. *et al.* SutA is a bacterial transcription factor expressed during slow growth in *Pseudomonas*  
617 *aeruginosa*. *Proc. Natl. Acad. Sci. USA* **113**, E597–E605 (2016). DOI: 10.1073/pnas.1514412113.
- 618 40. Grammel, M., Zhang, M. M. & Hang, H. C. Orthogonal alkynyl amino acid reporter for selective labeling  
619 of bacterial proteomes during infection. *Angew. Chem. Int. Ed. Engl.* **122**, 6106–6110 (2010). DOI:  
620 10.1002/anie.201002050.
- 621 41. Mahdavi, A. *et al.* Identification of secreted bacterial proteins by noncanonical amino acid tagging. *Proc.*  
622 *Natl. Acad. Sci. USA* **111**, 433–438 (2014). DOI: 10.1073/pnas.1301740111.
- 623 42. Chande, A. G. *et al.* Selective enrichment of mycobacterial proteins from infected host macrophages.  
624 *Scientific Reports* **5**, 13430 (2015). DOI: 10.1038/srep13430.
- 625 43. Cowley, E. S., Kopf, S. H., LaRiviere, A., Ziebis, W. & Newman, D. K.. Pediatric cystic fibrosis sputum  
626 can be chemically dynamic, anoxic, and extremely reduced due to hydrogen sulfide formation. *MBio* **6**,  
627 e00767–15 (2015). DOI: 10.1128/mBio.00767–15.
- 628 44. Bagert, J. D. *et al.* Quantitative, time-resolved proteomic analysis by combining bioorthogonal  
629 noncanonical amino acid tagging and pulsed stable isotope labeling by amino acids in cell culture. *Mol.*  
630 *Cell. Proteomics* **13**, 1352–1358 (2014). DOI: 10.1074/mcp.M113.031914.
- 631 45. Palmer, K. L., Mashburn, L. M., Singh, P. K. & Whiteley, M. Cystic fibrosis sputum supports growth and  
632 cues key aspects of *Pseudomonas aeruginosa* physiology. *J. Bacteriol.* **187**, 5267–5277 (2005).  
633 DOI:10.1128/JB.187.15.5267-5277.2005.

- 634 46. Callahan, B. J. *et al.* DADA2: high-resolution sample inference from Illumina amplicon data. *Nat.*  
635 *Methods* **13**, 581-583 (2016). DOI: 10.1038/nmeth.3869.
- 636 47. Acar, M., Mettetal, J. T. & Van Oudenaarden, A. Stochastic switching as a survival strategy in fluctuating  
637 environments. *Nat. Genet.* **40**, 471-475 (2008). DOI: 10.1038/ng.110.
- 638 48. Anderson, T. H. & Domsch, K. H. Application of eco-physiological quotients ( $qCO_2$  and  $qD$ ) on microbial  
639 biomasses from soils of different cropping histories. *Soil Biol. Biochem.* **22**, 251-255 (1990). DOI:  
640 10.1016/0038-0717(90)90094-G.
- 641 49. Agard, N. J., Prescher, J. A., & Bertozzi, C. R. A strain-promoted [3 + 2] azide-alkyne cycloaddition for  
642 covalent modification of biomolecules in living systems, *J. Am. Chem. Soc.* **126**, 15046–15047 (2004).  
643 DOI: 10.1021/ja044996f.
- 644 50. Schindelin J. *et al.* Fiji: an open-source platform for biological-image analysis. *Nat. Methods* **9**, 676-682  
645 (2012). DOI: 10.1038/nmeth.2019.
- 646 51. Huang L. & Wang M. J. Image thresholding by minimizing the measure of fuzziness. *Pattern*  
647 *Recognition* **28**, 41-51 (1995). DOI: 10.1016/0031-3203(94)E0043-K.
- 648 52. Urakawa, H., Martens-Habbena, W. & Stahl, D. A. High abundance of ammonia-oxidizing *Archaea* in  
649 coastal waters, determined using a modified DNA extraction method. *App. Environ. Microbiol.* **76**, 2129-  
650 2135 (2010). DOI: 10.1128/AEM.02692-09.
- 651 53. Gohl D. *et al.* Systematic improvement of amplicon marker gene methods for increased accuracy in  
652 microbiome studies. *Nat. Biotechnol.* **34**, 942-949 (2016). DOI:10.1038/nbt.3601.
- 653 54. Wang, Q., Garrity, G. M., Tiedje, J. M. & Cole, J. R. Naive Bayesian classifier for rapid assignment of  
654 rRNA sequences into the new bacterial taxonomy. *App. Environ. Microbiol.* **73**, 5261-5267 (2007).  
655 DOI:10.1128/AEM.00062-07.
- 656 55. Yilmaz, P. *et al.* The SILVA and “all-species living tree project (LTP)” taxonomic frameworks. *Nucleic*  
657 *Acids Res.* **42**, D643-D648 (2014). DOI: 10.1093/nar/gkt1209.
- 658 56. Quast, C. *et al.* The SILVA ribosomal RNA gene database project: improved data processing and web-  
659 based tools. *Nucleic acids Res.* **41**, D590-D596 (2012). DOI: 10.1093/nar/gks1219.
- 660 57. Davis, N. M., Proctor, D., Holmes, S. P., Relman, D. A. & Callahan, B. J. Simple statistical identification  
661 and removal of contaminant sequences in marker-gene and metagenomics data. *Microbiome* **6**, 226  
662 (2018). DOI: 10.1186/s40168-018-0605-2.

- 663 58. McMurdie, P. J. & Holmes, S. phyloseq: an R package for reproducible interactive analysis and graphics  
664 of microbiome census data. *PloS One* **8**, e61217 (2013). DOI: 10.1371/journal.pone.0061217.
- 665 59. Badalamenti J. P. & Hunter R. C. Complete genome sequence of *Achromobacter xylosoxidans* MN001,  
666 a cystic fibrosis airway isolate. *Genome Announc.* **3**, ee00947-15(2015). DOI:  
667 10.1128/genomeA.00947-15.
- 668 60. Lewenza S., Conway B., Greenberg E. P., & Sokol P. A. Quorum sensing in *Burkholderia cepacia*:  
669 identification of the luxRI homologs cepRI. *J. Bacteriol.* **181**, 748-756 (1999).
- 670 61. Saltikov C. W. & Newman D. K. Genetic identification of a respiratory arsenate reductase. *Proc. Natl.*  
671 *Acad. Sci. USA* **100**, 10983-10988 (2003). DOI:10.1073/pnas.1834303100.
- 672 62. Rahme, L. G. *et al.* Common virulence factors for bacterial pathogenicity in plants and animals. *Science*  
673 **268**, 1899-1902 (1995). DOI: 10.1126/science.7604262.
- 674 63. Collins M. D., Hutson R. A., Båverud V. & Falsen E. Characterization of a *Rothia*-like organism from a  
675 mouse: description of *Rothia nasimurium* sp. nov. and reclassification of *Stomatococcus mucilaginosus*  
676 as *Rothia mucilaginosus* comb. nov. *Int. J. Syst. Evol. Microbiol.* **50**, 1247-1251 (2000).  
677 DOI:10.1099/00207713-50-3-1247.
- 678 64. Blomster-Hautamaa D. A. & Schlievert P. M. Preparation of toxic shock syndrome toxin-1. *Methods*  
679 *Enzymol.* **165**, 37-43 (1988). DOI: 10.1016/S0076-6879(88)65009-9.

680

## 681 **ACKNOWLEDGEMENTS**

682 We thank Roland Hatzenpichler (Montana State University) for technical advice, Alex Vitti for graphic  
683 design, the care team at the UMN Adult CF Treatment Center and their patients for participating in the  
684 research. This work was supported by a Gilead Sciences Investigator Sponsored Research Award,  
685 Cystic Fibrosis Foundation Research Grant (HUNTER16G0) to RCH. KAB was supported by a NIH  
686 Lung Sciences T32 fellowship (#2T32HL007741-21) awarded through NHLBI. SKL received support  
687 from T32 (#T90 DE0227232) and F31 (#F31 DE027602) fellowships through the National Institute of  
688 Dental and Craniofacial Research.

689

690

691 **AUTHOR CONTRIBUTIONS**

692 T.V., S.L., and K.B. contributed equally to this work. T.V., S.L., K.B., and R.H. were responsible for  
693 study design and wrote the manuscript. T.V., K.B. and R.H. performed BONCAT labeling and imaging  
694 experiments. T.V., K.B., and J.M. performed and optimized flow cytometry and FACS. L.C. and J.D.  
695 were responsible for patient recruitment, sample collection and patient data management. S.K.  
696 performed sequencing and analysis.

697

698 **COMPETING INTERESTS**

699 The authors declare no competing interests.

700

701 **CORRESPONDING AUTHOR**

702 Correspondence to Ryan C. Hunter.

703

704 **Bioorthogonal non-canonical amino acid tagging**  
705 **reveals translationally active subpopulations of the**  
706 **cystic fibrosis lung microbiota.**

707

708

709 **Valentini *et al.***

710

711 **Supplemental Data**

712

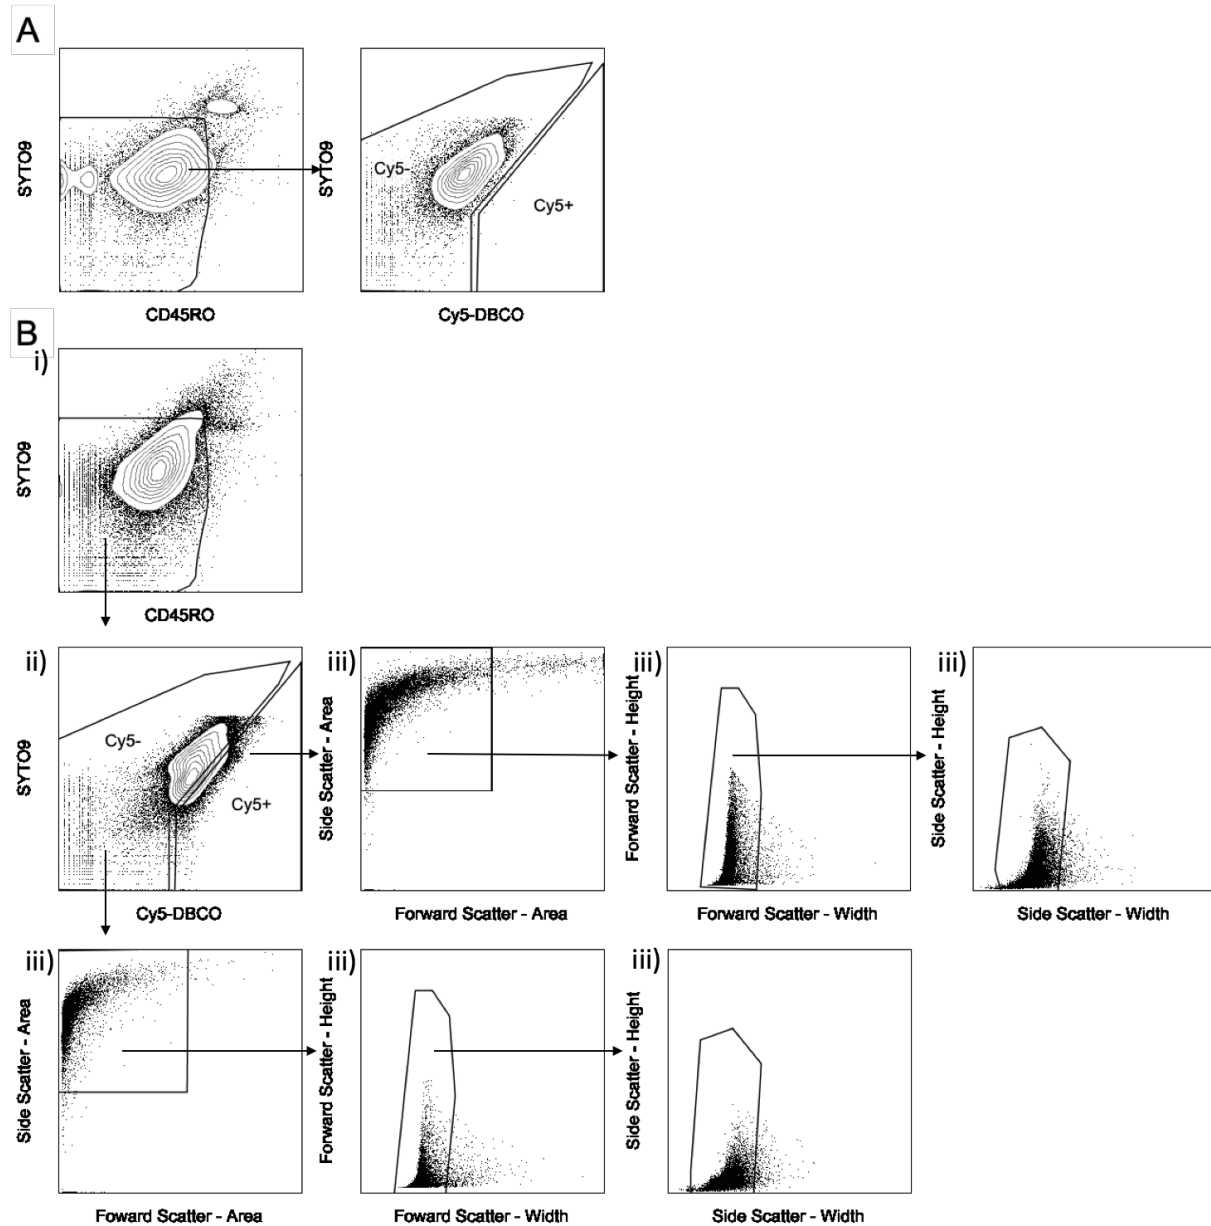

713  
714  
715  
716  
717  
718  
719  
720  
721  
722  
723

**Supplementary Figure 1. Representative gating scheme for AHA+ and AHA- populations.** (a) AHA- control samples were first gated based on PE anti-human CD45RO staining to remove human leukocytes. Next, the negative control was used to measure non-specific Cy5-DBCO binding to define Cy5+ (*i.e.* active) and Cy5- (*i.e.* inactive) sorting gates. (b) shows a patient matched AHA+ sample and the gating used to isolate populations of interest. The gating strategy involved, i) excluding human leukocytes using PE anti-human CD45RO, ii) using Cy5+ and Cy5- gates based on the patient-matched AHA- control, iii) creating forward scatter and side scatter plots to remove large, complex particulates and debris, and liberal doublet discrimination to minimize the loss of bacterial aggregates.



724

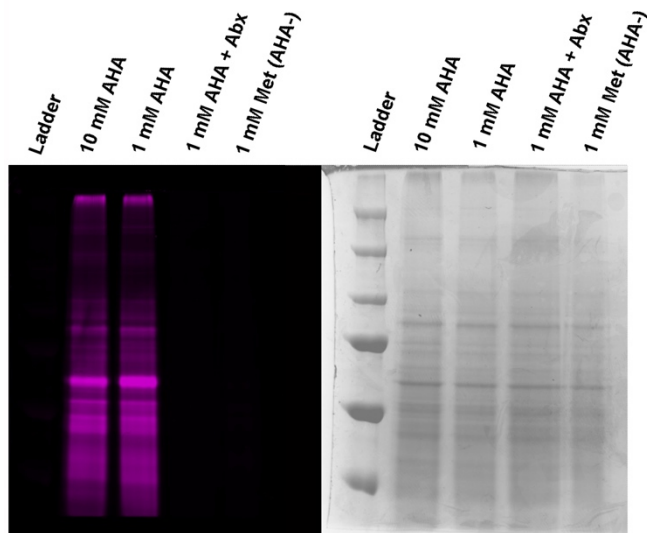

725

726

727

728

729

**Supplementary Figure 2. BONCAT labeling of *P. aeruginosa* is specific for AHA and translational activity.** SDS-PAGE visualization of BONCAT labeling of laboratory cultures of *P. aeruginosa* PA14. Labeling is specific for AHA and inhibited by antibiotics (Abx = chloramphenicol, tetracycline, tobramycin).

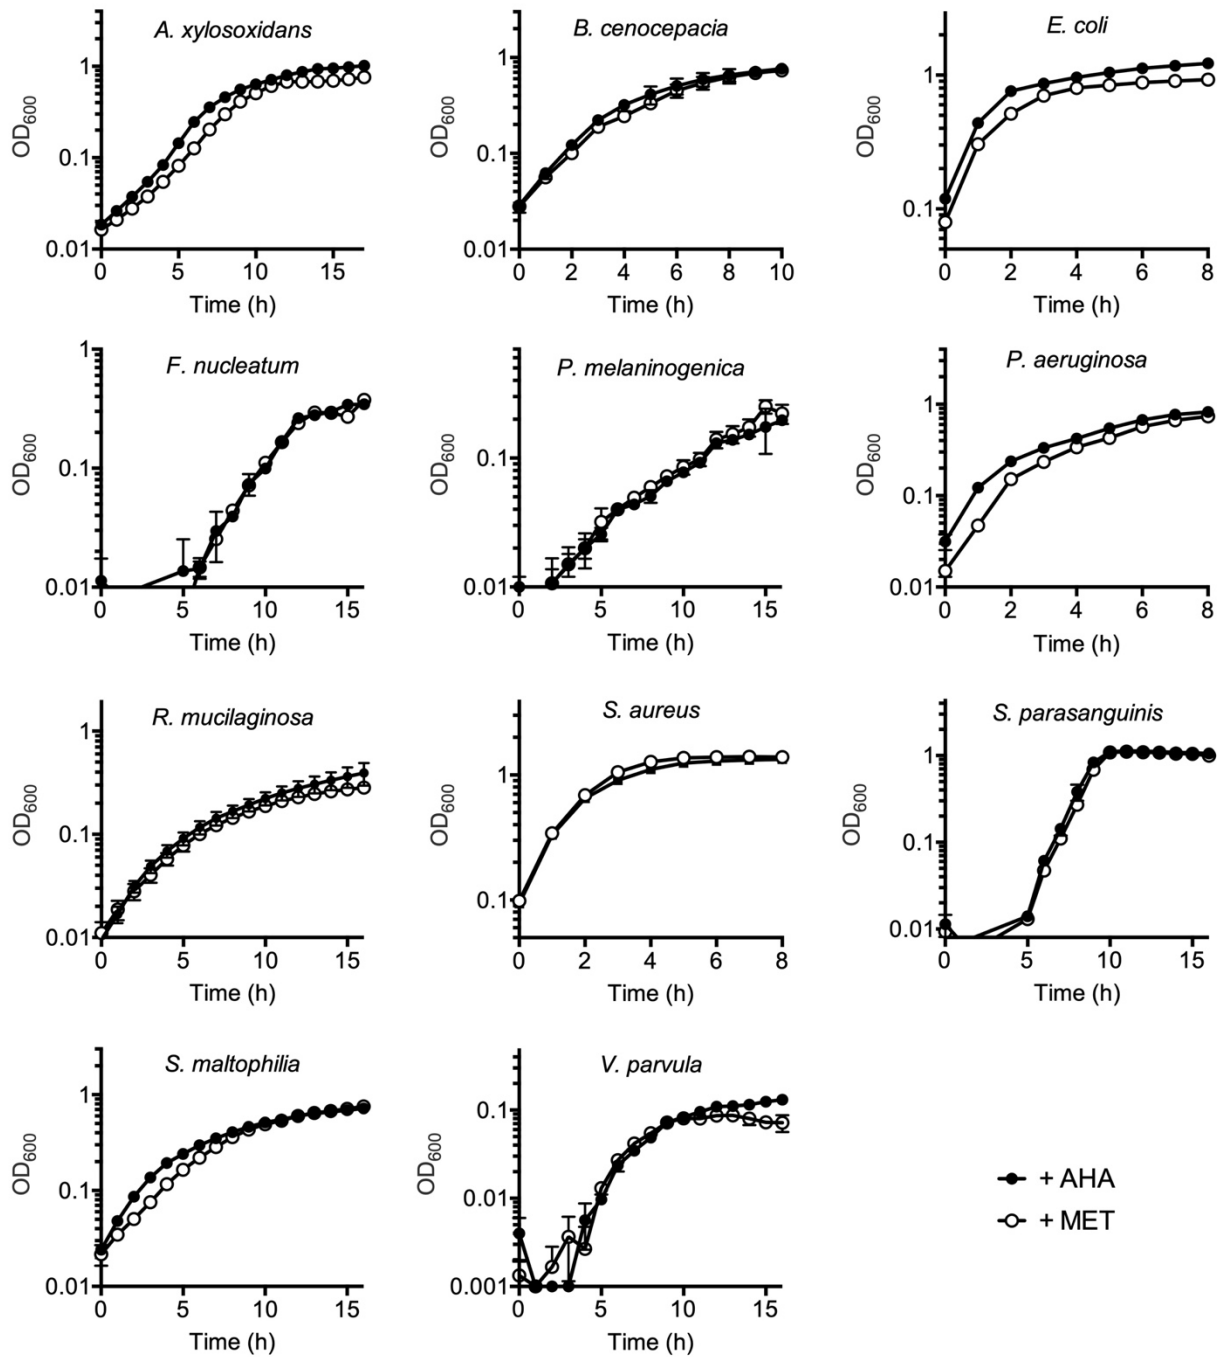

730  
731  
732

**Supplementary Figure 3.** AHA-incubation has negligible effect on bacterial growth.

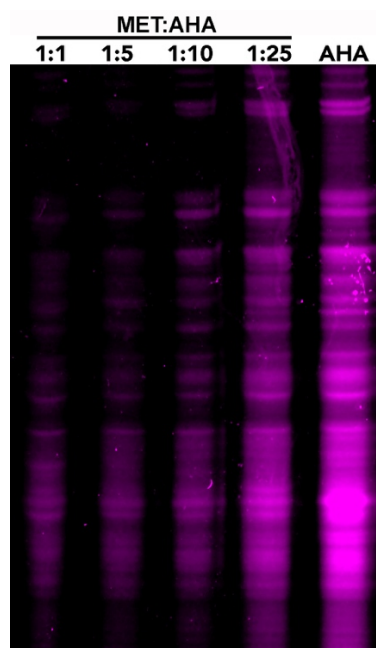

733

734 **Supplementary Figure 4. SDS-PAGE determination of MET:AHA ratio required for BONCAT labeling of *P.***  
735 ***aeruginosa*.** Cells were grown in varying concentrations of MET:AHA prior to labeling with Cy5-DBCO. Based on these  
736 profiles, a 1:10 ratio was selected for labeling of *in vitro* bacterial cultures and expectorated sputum samples.

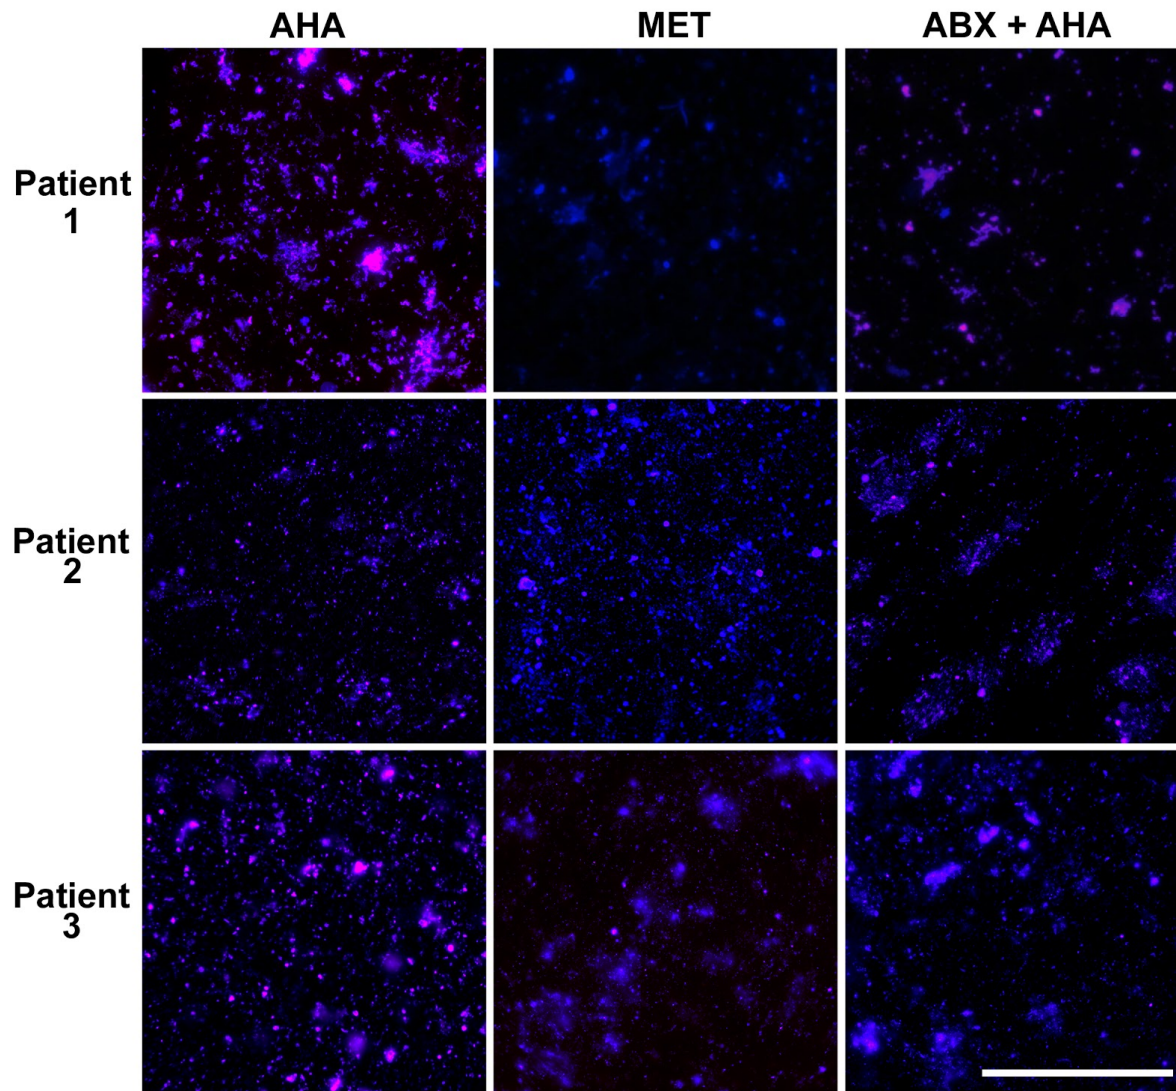

737  
738

739 **Supplementary 5. BONCAT labeling of sputum microbiota is specific for AHA.** Expecterated sputum samples were  
740 supplemented with 6mM AHA and incubated for 3h prior to Cy5-DBCO labeling (Cy5; magenta) and counterstaining  
741 (SYTO64; blue). Negligible background fluorescence was observed in paired sputum samples incubated with methionine  
742 (MET). Incubation with antibiotics prior to AHA labeling (ABX+AHA) resulted in a moderate decrease in fluorescence that  
743 may reflect antimicrobial tolerance among airway microbiota. Bar = 100  $\mu$ m. Abx = chloramphenicol, tetracycline,  
744 tobramycin.

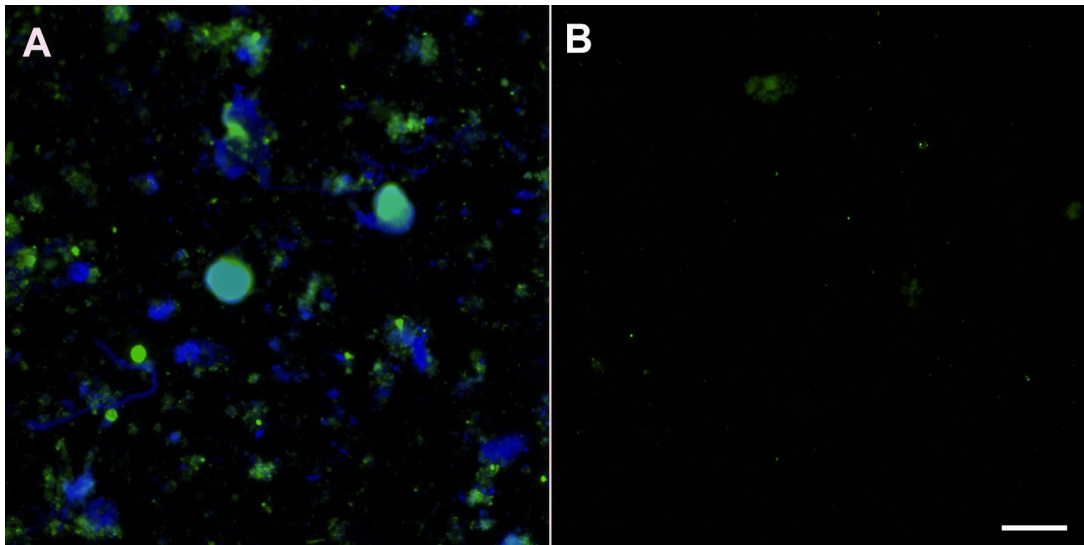

745  
746  
747  
748  
749  
750  
751  
752

**Supplementary Figure 6. Validation of BONCAT-FACS.** During sorting, the Cy5 label is subject to photobleaching; we therefore used immunostaining (anti-Cy5 antibody) and fluorescent microscopy to validate FACS sort integrity. Anti-Cy5 labeling of (a) “sort input” and (b) “sort positive” samples demonstrates that FACS effectively removes host cells and AHA-bacteria. As expected, all cells in the positive gate were anti-Cy5 reactive, confirming AHA uptake and translational activity among this bacterial subpopulation.

753

754

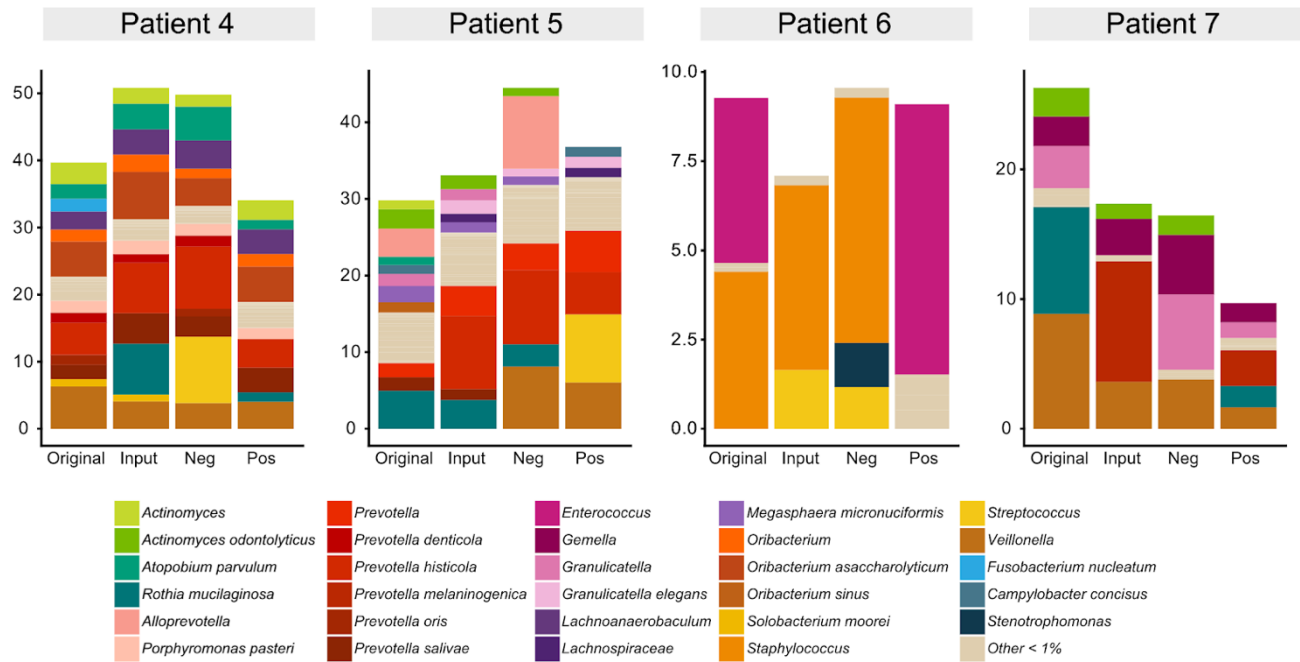

755

756

757

758

759

760

761

**Supplementary Figure 7. Low abundance community members are translationally active.** Bacterial community membership of taxa with relative abundances less than 10%. Notable differences are observed between “sort positive” community composition (i.e. translational activity) relative to the “original” fraction.

762  
763

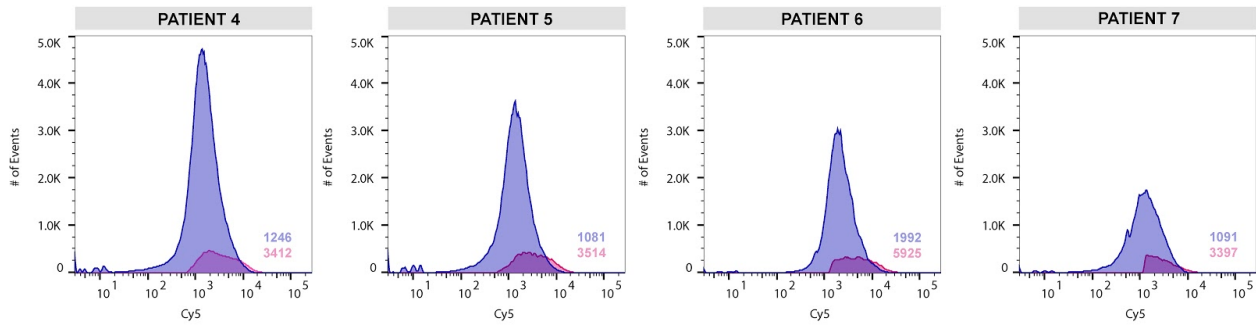

764  
765  
766  
767  
768  
769  
770

**Supplementary Figure 8. Confirmation of BONCAT Labeling.** Flow cytometry histograms represent the number of events (cell counts) versus the log fluorescent intensity of Cy5 (blue = Cy5- population, magenta = Cy5+ population). Numbers in the lower right-hand corner represent the geometric means of Cy5 intensity. The Cy5+ population exhibited a higher geometric mean of fluorescent intensity validating AHA uptake and BONCAT labeling of the active subpopulation from CF sputum samples.

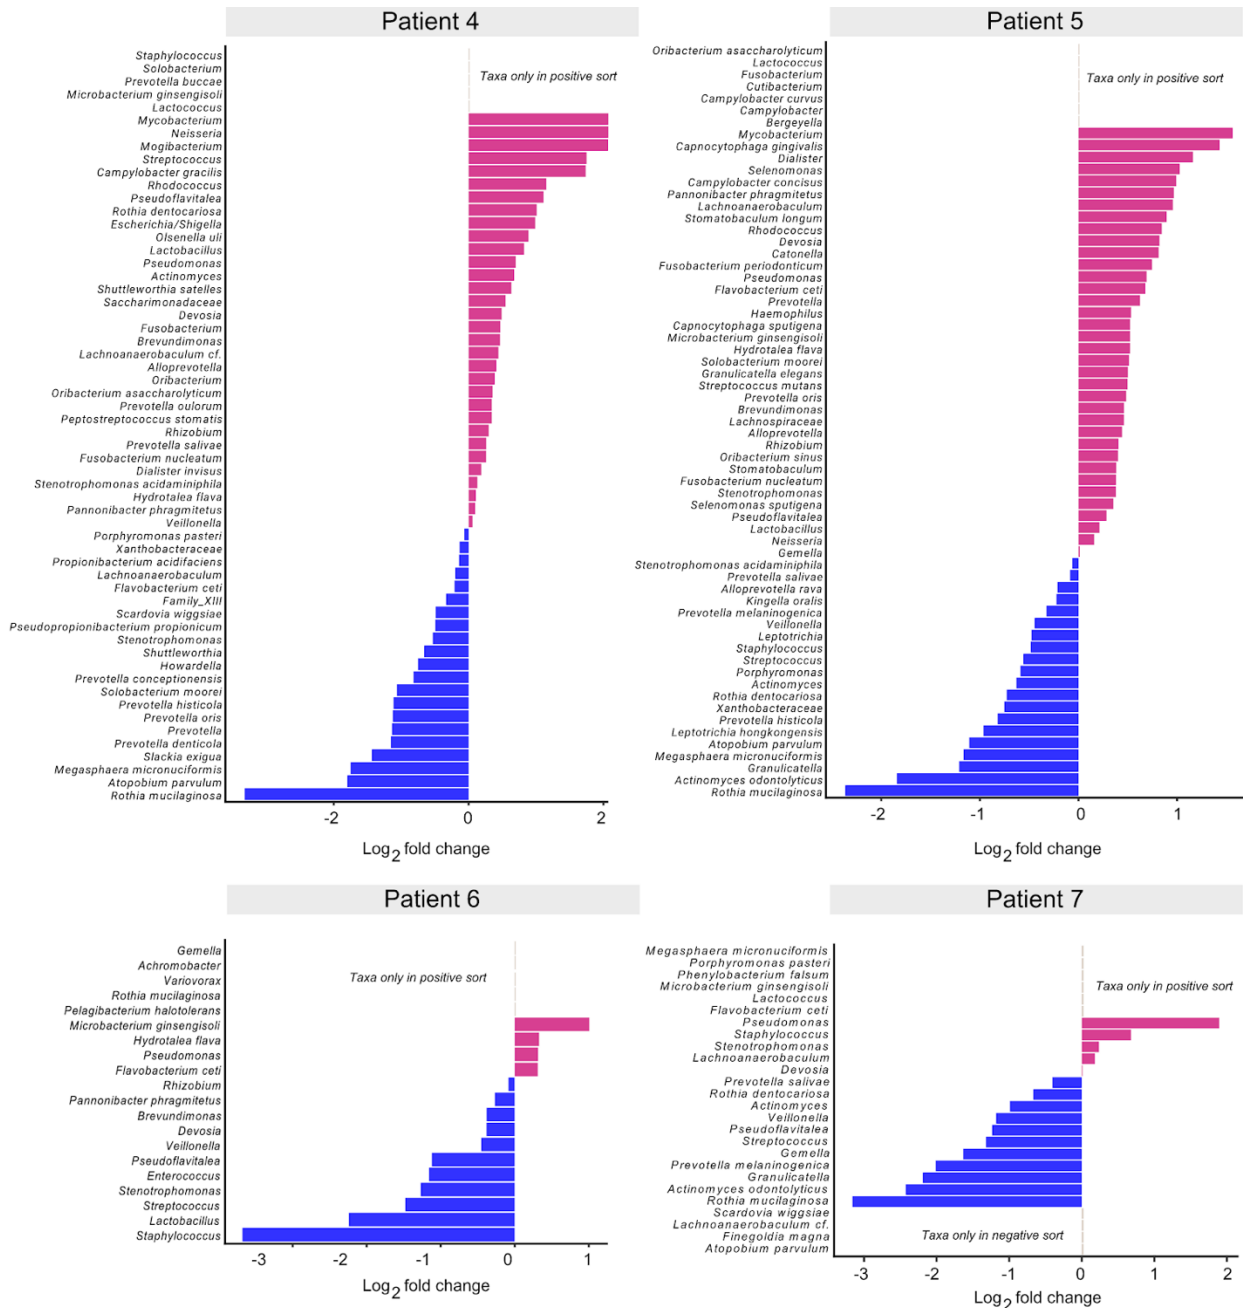

771  
772  
773  
774  
775  
776

**Supplementary Figure 9.** Log<sub>2</sub> fold difference in taxon relative abundance between “sort positive” and “sort negative” fractions. Pink and blue bars indicate taxa that were increased in relative abundance in the positive and negative fractions, respectively.



777  
778  
779  
780

**Supplementary Table 1.** Patient clinical data.

| Subject | Age | Sex | CFTR genotype       | FEV1% | Bacterial Cultures                                                              | Current Antibiotics                                                                         |
|---------|-----|-----|---------------------|-------|---------------------------------------------------------------------------------|---------------------------------------------------------------------------------------------|
| 1       | 23  | F   | ΔF508/ΔF508         | 38    | <i>A. xylosoxidans</i>                                                          | azithromycin, colistin, doxycycline                                                         |
| 2       | 38  | M   | ΔF508/ΔF508         | 31    | <i>A. xylosoxidans</i> ,<br><i>B. cepacia complex</i> ,<br><i>P. aeruginosa</i> | azithromycin, aztreonam, doxycycline,<br>meropenem, sulfamethoxazole-trimethoprim,<br>zosyn |
| 3       | 23  | M   | ΔF508/ΔI507         | 56    | <i>P. aeruginosa</i> , <i>S. aureus</i>                                         | azithromycin, aztreonam, tobramycin                                                         |
| 4       | 40  | M   | ΔF508/ΔF508         | 58    | <i>M. abscessus</i> , <i>P. aeruginosa</i>                                      | azithromycin, aztreonam, ciprofloxacin,<br>sulfamethoxazole-trimethoprim, tobramycin        |
| 5       | 21  | M   | ΔF508/R1102X        | 84    | <i>M. abscessus</i> , <i>S. aureus</i> ,<br><i>S. maltophilia</i>               | none                                                                                        |
| 6       | 23  | F   | ΔF508/N1303K        | 53    | <i>A. xylosoxidans</i> , <i>P. aeruginosa</i> ,<br><i>S. aureus</i>             | azithromycin, ciprofloxacin, colistin, neomycin,<br>tobramycin                              |
| 7       | 41  | M   | ΔF508/621+1G-<br>>T | 42    | <i>P. aeruginosa</i> ,<br><i>S. pseudintermedius</i>                            | azithromycin, aztreonam, doxycycline,                                                       |

781

782

783

784

**Supplementary Table 2.** BONCAT-FACS summary.

| Patient | Gate | # Events Collected | % of Parent Population <sup>a</sup> | Geometric mean of fluorescent intensity (Cy5) <sup>b</sup> |
|---------|------|--------------------|-------------------------------------|------------------------------------------------------------|
| 4       | Cy5- | 7,505,073          | 70.3                                | 1246                                                       |
|         | Cy5+ | 7,541,917          | 18.5                                | 3412                                                       |
| 5       | Cy5- | 8,008,775          | 58.3                                | 1081                                                       |
|         | Cy5+ | 7,644,034          | 16.1                                | 3514                                                       |
| 6       | Cy5- | 8,005,002          | 38.2                                | 1992                                                       |
|         | Cy5+ | 7,669,143          | 12.4                                | 5925                                                       |
| 7       | Cy5- | 8,001,124          | 67.7                                | 1091                                                       |
|         | Cy5+ | 1,363,517          | 12.1                                | 3397                                                       |

785

786

<sup>a</sup> Percentages reflect % of parent population post-CD45RO gating. Remaining counts fell outside Cy5-/Cy5+ gates.

<sup>b</sup> Histograms are shown in Supplementary Figure 8.
